# Supplementary material for: Analysis of 44 Vibrio anguillarum genomes reveals high genetic diversity
Source: PeerJ. 2020 Dec 3;8:e10451. doi: 10.7717/peerj.10451 (PMC7719292; doi:10.7717/peerj.10451)
Supplement: Supplemental Information 2 [file peerj-08-10451-s002.xlsx]

## Sheet: Sheet1
Strain	Serotype	Year	Host	Origin of fish	Location	Water	Coverage	SUBID	BioProject	Biosample	Genbank accession number	Size (bp)	N50	GC%	Genes (total)	CDS (total)	Proteins	RNA	contigs
150312-1/1	O1	2015	Rainbow trout	Aquaculture, Denmark	1	fresh	331	SUB3726705	PRJNA435920	SAMN08606298	PUIE00000000	4939554	120952	44.1	5315	5233	5069	82	1369
920619-1/1	O1	1992	Rainbow trout	Aquaculture, Denmark	2	salt	345	SUB4631529	PRJNA497208	SAMN10250725	RDPU00000000	4896029	102717	43.97	5001	4918	4718	83	1028
100719-1/4A	O1	2010	Rainbow trout	Aquaculture, Denmark	2	salt	329	SUB4631529	PRJNA497208	SAMN10250726	RDPT00000000	5042092	105397	44.04	5521	5437	5269	84	1570
090819-1/28A	O1	2009	Rainbow trout	Aquaculture, Denmark	2	salt	280	SUB4631529	PRJNA497208	SAMN10250727	RDPS00000000	5469497	192630	43.86	6261	6188	5978	73	2039
131108-2/1	O1	2013	Rainbow trout	Aquaculture, Denmark	3	fresh	298	SUB4631529	PRJNA497208	SAMN10250728	RDPR00000000	4955865	108481	44.03	5295	5206	5052	89	1346
171124-1/1A	O1	2017	Rainbow trout	Aquaculture, Denmark	4	salt	351	SUB4631529	PRJNA497208	SAMN10250729	RDPQ00000000	5033182	121056	43.98	5442	5358	5168	84	1454
ATCC 43306; 1173/1	O2A	1976	Cod	Wild fish, Denmark	5	salt	275	SUB5047491	PRJNA435920	SAMN10756446	SCLB00000000	5010312	95707	43.91	5259	5174	4991	85	1494
090602-1/12	O1	2009	Rainbow trout	Aquaculture, Denmark	6	salt	332	SUB4631529	PRJNA497208	SAMN10250763	RDOL00000000	4998332	97907	44.02	5461	5373	5191	88	1511
090707-1/2A	O2A	2009	Rainbow trout	Aquaculture, Denmark	6	salt	336	SUB4631529	PRJNA497208	SAMN10250730	RDQD00000000	4977895	81027	43.92	5126	5046	4876	80	1122
090903-1/2B	O2A	2009	Rainbow trout	Aquaculture, Denmark	2	salt	301	SUB4631529	PRJNA497208	SAMN10250764	RDOK00000000	5363881	92830	43.8	5808	5727	5503	81	1383
891221-1/1	O1	1989	Rainbow trout	Aquaculture, Denmark	7	salt	336	SUB4631529	PRJNA497208	SAMN10250731	RDPP00000000	4724559	108481	44.15	4901	4822	4678	79	1015
990909-1/2A	O1	1999	Rainbow trout	Aquaculture, Denmark	6	salt	325	SUB4631529	PRJNA497208	SAMN10250732	RDPO00000000	4805160	108481	44.12	5057	4971	4826	86	1119
950810-4/1	O2A	1995	Rainbow trout	Aquaculture, Denmark	8	salt	267	SUB4631529	PRJNA497208	SAMN10250733	RDPN00000000	5359570	27094	43.95	5749	5671	5391	78	1481
150811-1/228H	O2A	2015	Rainbow trout	Aquaculture, Denmark	2	salt	314	SUB4631529	PRJNA497208	SAMN10250734	RDQC00000000	5431437	105709	43.74	5934	5840	5612	94	1561
030905-1/1A	O1	2003	Rainbow trout	Aquaculture, Denmark	9	salt	337	SUB4631529	PRJNA497208	SAMN10250735	RDPM00000000	4956205	102717	44.05	5338	5457	5094	81	1397
130829-1/3A	O1	2013	Rainbow trout	Aquaculture, Denmark	10	fresh	290	SUB4631529	PRJNA497208	SAMN10250736	RDPL00000000	5003304	102717	43.96	5227	5149	4997	78	1207
178581-2	O1	2017	Rainbow trout	Aquaculture, Denmark	2	salt	355	SUB4631529	PRJNA497208	SAMN10250737	RDPK00000000	4845797	108490	44.04	4939	4858	4702	81	963
040809-1/2A	O2A	2004	Rainbow trout	Aquaculture, Denmark	11	salt	325	SUB4631529	PRJNA497208	SAMN10250738	RDPJ00000000	5408553	105710	43.78	5823	5736	5507	87	1402
040915-1/1B	O2A	2004	Rainbow trout	Aquaculture, Denmark	2	salt	321	SUB4631529	PRJNA497208	SAMN10250739	RDPI00000000	5562798	165019	43.68	6304	6225	6035	79	1830
840613-2/1	O2A	1984	Rainbow trout	Aquaculture, Denmark	11	salt	344	SUB4631529	PRJNA497208	SAMN10250740	RDPH00000000	4896855	93541	43.97	4982	4898	4727	84	936
040714-1/1D	O2A	2004	European flounder	Wild fish, Denmark	12	salt	321	SUB4631529	PRJNA497208	SAMN10250741	RDPG00000000	4566876	30502	44.42	4887	4800	4586	87	1313
090707-1/1A	O2A	2009	Rainbow trout	Aquaculture, Denmark	6	salt	361	SUB4631529	PRJNA497208	SAMN10250742	RDPF00000000	4475814	93405	44.23	4688	4601	4462	87	1056
030305-1/5	O2B	2003	European eel	Aquaculture, Denmark	13	salt	324	SUB3726705	PRJNA435920	SAMN08606298	PUIE00000000	4596370	55743	44.21	4948	4867	4651	81	1329
090602-1/6B	O2A	2009	Rainbow trout	Aquaculture, Denmark	6	salt	311	SUB4631529	PRJNA497208	SAMN10250743	RDPE00000000	4356095	93679	44.3	4436	4364	4225	72	881
040714-1/4C	O2A	2004	European flounder	Wild fish, Denmark	12	salt	331	SUB4631529	PRJNA497208	SAMN10250744	RDPD00000000	5018856	27045	44.13	5658	5574	5306	84	1912
060721-1/1B	O2A	2006	Rainbow trout	Aquaculture, Denmark	9	salt	310	SUB4631529	PRJNA497208	SAMN10250745	RDPC00000000	5123953	79809	43.88	5551	5474	5287	77	1568
090519-1/13A	O2A	2009	Rainbow trout	Aquaculture, Denmark	6	salt	294	SUB4631529	PRJNA497208	SAMN10250746	RDPB00000000	5326849	85406	43.9	6084	6004	5765	80	1919
090710-1/17A	O2A	2009	Rainbow trout	Aquaculture, Denmark	2	salt	309	SUB4631529	PRJNA497208	SAMN10250747	RDPA00000000	5167898	89560	44.06	5948	5861	5646	87	1900
090819-1/29A	O2A	2009	Rainbow trout	Aquaculture, Denmark	2	salt	327	SUB4631529	PRJNA497208	SAMN10250748	RDOZ00000000	4887025	46794	44.08	5377	5297	5066	80	1614
100719-1/3A	O2A	2010	Rainbow trout	Aquaculture, Denmark	2	salt	329	SUB4631529	PRJNA497208	SAMN10250749	RDOY00000000	5191290	59857	43.89	5871	5789	5541	82	1925
100721-1/3A	O2A	2010	Rainbow trout	Aquaculture, Denmark	2	salt	292	SUB4631529	PRJNA497208	SAMN10250750	RDOX00000000	4763888	49115	44.17	5199	5126	4905	73	1537
100819-1/4A	O2A	2010	Rainbow trout	Aquaculture, Denmark	6	salt	284	SUB4631529	PRJNA497208	SAMN10250751	RDOW00000000	5042092	105614	43.93	5987	5898	5684	89	1570
171026-1/1	O1	2017	Rainbow trout	Aquaculture, Denmark	14	fresh	337	SUB4631529	PRJNA497208	SAMN10250752	RDOV00000000	5133645	104750	43.95	5586	5504	5309	82	1564
171004-1/1	O1	2017	Rainbow trout	Aquaculture, Denmark	15	fresh	320	SUB4631529	PRJNA497208	SAMN10250753	RDOU00000000	5168970	102717	44	5744	5655	5453	89	1680
171013-1/2	O1	2017	Rainbow trout	Aquaculture, Denmark	16	fresh	291	SUB4631529	PRJNA497208	SAMN10250754	RDOT00000000	4849884	108481	44.12	5180	5090	4926	90	1238
171013-1/4	O1	2017	Rainbow trout	Aquaculture, Denmark	10	fresh	327	SUB4631529	PRJNA497208	SAMN10250755	RDOS00000000	5005858	102717	44.07	5395	5313	5124	82	1466
060712-1/1	O1	2006	Rainbow trout	Aquaculture, Denmark	17	salt	252	SUB4631529	PRJNA497208	SAMN10250756	RDOR00000000	5157412	114512	44.05	5693	5611	5412	82	1650
9006.-4/1	O2A	1980	Rainbow trout	Aquaculture, Denmark	18	salt	335	SUB4631529	PRJNA497208	SAMN10250757	RDOQ00000000	5018805	97061	44.05	5654	5576	5361	78	1839
4070 E	O3	1978	Rainbow trout	Aquaculture, Denmark	19	salt	299	SUB4631529	PRJNA497208	SAMN10250758	RDQB00000000	5115995	138870	44	5781	5695	5523	86	1858
980617-1/3A	O2A	1998	Rainbow trout	Aquaculture, Denmark	6	salt	300	SUB4631529	PRJNA497208	SAMN10250759	RDOP00000000	5174324	93540	43.84	5638	5546	5366	92	1529
910718-2/1A	O2A	1991	Rainbow trout	Aquaculture, Denmark	20	salt	346	SUB4631529	PRJNA497208	SAMN10250760	RDOO00000000	5016832	93413	43.97	5484	5408	5226	76	1598
840523-2/3	O1	1984	Rainbow trout	Aquaculture, Denmark	21	salt	331	SUB4631529	PRJNA497208	SAMN10250761	RDON00000000	5270444	108480	43.93	5885	5798	5594	87	1820
850617-1/1	O2A	1985	Northern pike	Wild fish, Finland	22	fresh	326	SUB5047491	PRJNA435920	SAMN10756445	SCLC00000000	5188648	284067	44.01	5859	5774	5616	85	2198
17-16730-2A	O1	2017	Rainbow trout	Aquaculture, Denmark	23	fresh	305	SUB4631529	PRJNA497208	SAMN10250762	RDOM00000000	5076563	120952	43.95	5436	5351	5165	85	1405
			*Location refers to were the fish came from. Fish with the same number originates from the same location/facility.
