# Supplementary material for: Analysis of 44 Vibrio anguillarum genomes reveals high genetic diversity
Source: PeerJ. 2020 Dec 3;8:e10451. doi: 10.7717/peerj.10451 (PMC7719292; doi:10.7717/peerj.10451)
Supplement: Supplemental Information 3 [file peerj-08-10451-s003.xlsx]

## Sheet: Tetracycline resistance
Tetracycline resistance
Strain	Resistance gene	Identity	Query/HSP	Contig	Position in contig	Accession no.	Inhibition zone oxytetracyclin	Oxytetracyclin sensitivity
							mm	R≤19; IR>19<23; S≥23
ATCC_43306	tet(34)	82.94	465/422	contig_10	226826..227246	AB061440	41	Sensitive
990909-1/2A	tet(34)	82.94	465/422	contig_2	227875..228295	AB061440	40	Sensitive
980617-1/3A	tet(34)	82.94	465/422	contig_2	226821..227241	AB061440	39	Sensitive
950810-4/1	tet(34)	82.94	465/422	contig_203	11604..12024	AB061440	44	Sensitive
920619-1/1	tet(34)	82.94	465/422	contig_2	438059..438479	AB061440	42	Sensitive
910718-2/1A	tet(34)	82.94	465/422	contig_16	226821..227241	AB061440	40	Sensitive
891221-1/1	tet(34)	82.94	465/422	contig_7	84320..84740	AB061440	42	Sensitive
850617-1/1	tet(34)	82.70	465/422	contig_1	904003..904423	AB061440	38	Sensitive
840613-2/1	tet(34)	82.94	465/422	contig_10	226860..227280	AB061440	39	Sensitive
840523-2/3	tet(34)	82.94	465/422	contig_22	227875..228295	AB061440	47	Sensitive
178581-2	tet(34)	82.94	465/422	contig_1	227875..228295	AB061440	40	Sensitive
171026-1/1	tet(34)	82.94	465/422	contig_1	227900..228320	AB061440	41	Sensitive
171124-1/1A	tet(34)	82.94	465/422	contig_13	227900..228320	AB061440	41	Sensitive
171013-1/4	tet(34)	82.94	465/422	contig_20	227900..228320	AB061440	41	Sensitive
171013-1/2	tet(34)	82.94	465/422	contig_8	438027..438447	AB061440	41	Sensitive
171004-1/1	tet(34)	82.94	465/422	contig_7	437936..438356	AB061440	42	Sensitive
150811-1/228H	tet(34)	82.70	465/422	contig_1	125515..125935	AB061440	41	Sensitive
150312-1/1	tet(34)	82.94	465/422	contig_5	437936..438356	AB061440	42	Sensitive
131108-2/1	tet(34)	82.94	465/422	contig_4	437936..438356	AB061440	39	Sensitive
130829-1/3A	tet(34)	82.94	465/422	contig_10	225631..226051	AB061440	41	Sensitive
100819-1/4A	tet(34)	82.70	465/422	contig_5	227567..227987	AB061440	41	Sensitive
100721-1/3A	tet(34)	83.18	465/422	contig_3	52545..52965	AB061440	44	Sensitive
100719-1/3A	tet(34)	83.65	465/422	contig_66	8039..8459	AB061440	41	Sensitive
100719-1/4A	tet(34)	82.94	465/422	contig_2	227950..228370	AB061440	42	Sensitive
090903-1/2B	tet(34)	82.70	465/422	contig_12	227577..227997	AB061440	37	Sensitive
090819-1/29A	tet(34)	83.18	465/422	contig_35	93334..93754	AB061440	42	Sensitive
090819-1/28A	tet(34)	83.41	465/422	contig_14	84127..84547	AB061440	40	Sensitive
090710-1/17A	tet(34)	82.70	465/422	contig_1	125774..126194	AB061440	40	Sensitive
090707-1/2A	tet(34)	82.94	465/422	contig_32	83976..84396	AB061440	39	Sensitive
090707-1/1A	tet(34)	82.94	465/422	contig_43	52408..52828	AB061440	38	Sensitive
090602-1/12	tet(34)	82.94	465/422	contig_8	227875..228295	AB061440	42	Sensitive
090602-1/6B	tet(34)	82.94	465/422	contig_22	84087..84507	AB061440	38	Sensitive
090519-1/13A	tet(34)	82.70	465/422	contig_15	227403..227823	AB061440	39	Sensitive
060721-1/1B	tet(34)	82.94	465/422	contig_21	226821..227241	AB061440	41	Sensitive
060712-1/1	tet(34)	82.94	465/422	contig_8	227880..228300	AB061440	41	Sensitive
040915-1/1B	tet(34)	83.41	465/422	contig_4	381862..382282	AB061440	40	Sensitive
040809-1/2A	tet(34)	82.70	465/422	contig_11	227525..227945	AB061440	38	Sensitive
040714-1/4C	tet(34)	82.70	465/422	contig_93	8039..8459	AB061440	45	Sensitive
040714-1/1D	tet(34)	82.70	465/422	contig_103	8039..8459	AB061440	45	Sensitive
030905-1/1A	tet(34)	82.94	465/422	contig_4	437936..438356	AB061440	42	Sensitive
030305-1/5	tet(34)	83.18	465/422	contig_25	52545..52965	AB061440	44	Sensitive
9006-4.1	tet(34)	82.94	465/422	contig_20	8038..8458	AB061440	41	Sensitive
4070_E	tet(34)	82.94	465/422	contig_12	124484..124904	AB061440	40	Sensitive
17-16730-2A	tet(34)	82.94	465/422	contig_10	437936..438356	AB061440	41	Sensitive

## Sheet: Fluoroquinolone & Quinolone res
Fluoroquinolone/quinolone resistance
Strain	Resistance gene	Identity	Query/HSP	Contig	Position in contig	Accession no.	Inhibition zone oxolinic acid	Oxolinic acid sensitivity
							mm	R≤16; IR>16<20; S≥20
ATCC_43306	qnrVC6	98.78	657/657	contig_1271	213..869	KC202804	44	Sensitive
990909-1/2A	qnrVC6	98.78	657/657	contig_59	5203..5859	KC202804	44	Sensitive
980617-1/3A	qnrVC6	98.73	657/553	contig_1434	39..591	KC202804	45	Sensitive
950810-4/1	qnrVC6	98.73	657/629	contig_138	446..1074	KC202804	48	Sensitive
920619-1/1	qnrVC6	98.78	657/657	contig_41	229..885	KC202804	44	Sensitive
910718-2/1A	None						44	Sensitive
891221-1/1	qnrVC6	98.78	657/657	contig_49	843..1499	KC202804	43	Sensitive
850617-1/1	None						40	Sensitive
840613-2/1	qnrVC6	98.78	657/657	contig_704	40..696	KC202804	44	Sensitive
840523-2/3	qnrVC6	98.78	657/657	contig_27	1067..1723	KC202804	50	Sensitive
178581-2	qnrVC6	98.78	657/657	contig_80	532..1188	KC202804	41	Sensitive
171026-1/1	qnrVC6	98.78	657/657	contig_43	1089..1745	KC202804	41	Sensitive
171124-1/1A	qnrVC6	98.78	657/657	contig_87	572..1228	KC202804	50	Sensitive
171013-1/4	qnrVC6	98.78	657/657	contig_79	1089..1745	KC202804	44	Sensitive
171013-1/2	qnrVC6	98.78	657/657	contig_66	90..746	KC202804	42	Sensitive
171004-1/1	qnrVC6	98.78	657/657	contig_98	1201..1857	KC202804	43	Sensitive
150811-1/228H	qnrVC6	98.87	657/529	contig_666	107..635	KC202804	44	Sensitive
150312-1/1	qnrVC6	98.78	657/657	contig_104	5379..6035	KC202804	41	Sensitive
131108-2/1	qnrVC6	98.78	657/657	contig_32	274..930	KC202804	42	Sensitive
130829-1/3A	qnrVC6	98.78	657/657	contig_139	335..991	KC202804	42	Sensitive
100819-1/4A	qnrVC6	98.52	657/472	contig_462	220..691	KC202804	43	Sensitive
100721-1/3A	None						50	Sensitive
100719-1/3A	qnrVC6	98.07	657/415	contig_459	1..415	KC202804	44	Sensitive
100719-1/4A	qnrVC6	98.78	657/657	contig_81	773..1429	KC202804	42	Sensitive
090903-1/2B	qnrVC6	98.52	657/541	contig_1029	113..653	KC202804	40	Sensitive
090819-1/29A	qnrVC6	98.58	657/562	contig_729	1..562	KC202804	48	Sensitive
090819-1/28A	qnrVC6	98.78	657/657	contig_10	3623..4279	KC202804	39	Sensitive
090710-1/17A	None						44	Sensitive
090707-1/2A	qnrVC6	98.78	657/657	contig_728	229..885	KC202804	42	Sensitive
090707-1/1A	None						46	Sensitive
090602-1/12	qnrVC6	98.78	657/657	contig_49	773..1429	KC202804	42	Sensitive
090602-1/6B	None						44	Sensitive
090519-1/13A	qnrVC6	98.78	657/657	contig_974	157..813	KC202804	42	Sensitive
060721-1/1B	qnrVC6	98.57	657/419	contig_59	1..419	KC202804	46	Sensitive
060712-1/1	qnrVC6	98.78	657/657	contig_43	296..952	KC202804	43	Sensitive
040915-1/1B	qnrVC6	98.78	657/657	contig_3	3682..4338	KC202804	37	Sensitive
040809-1/2A	qnrVC6	98.78	657/657	contig_728	158..814	KC202804	41	Sensitive
040714-1/4C	qnrVC6	98.73	657/629	contig_77	446..1074	KC202804	45	Sensitive
040714-1/1D	qnrVC6	98.73	657/629	contig_63	446..1074	KC202804	47	Sensitive
030905-1/1A	qnrVC6	98.78	657/657	contig_52	466..1122	KC202804	22	Sensitive
030305-1/5	qnrVC6	98.42	657/506	contig_556	39..544	KC202804	53	Sensitive
9006.-4/1	None						44	Sensitive
4070 E	None						47	Sensitive
17-16730-2A	qnrVC6	98.78	657/657	contig_106	1089..1745	KC202804	41	Sensitive
