# Supplementary material for: Analysis of 44 Vibrio anguillarum genomes reveals high genetic diversity
Source: PeerJ. 2020 Dec 3;8:e10451. doi: 10.7717/peerj.10451 (PMC7719292; doi:10.7717/peerj.10451)
Supplement: Supplemental Information 4 [file peerj-08-10451-s004.xlsx]

## Sheet: Sheet1
Strain	pJM1	pEIB1	p65	p67vang	pM3_unnamed	p292	p15	pL02	pJV
Accession number	AY312585.1	CP020532.1	CP023210.1	LK021128.1	NC_022225.1	CP023312.1	CP023056.1	NC_009351.	NC_019325.1
150312-1/1			x
920619-1/1	x
100719-1/4A			x
090819-1/28A
131108-2/1			x
171124-1/1a			x
ATCC 43306							x
090602-1/12			x
090707-1/2a
090903-1/2B
891221-1/1	x
990909-1/2A			x
950810-4/1
150811-1/228H
030905-1/1A	x
130829-1/3A			x
178581-2			x
040809-1/2A
040915-1/1B
840613-2/1							x
040714-1/1D
090707-1/1A
030305-1/5
090602-1/6B
040714-1/4C
060721-1/1B							x
090519-1/13A
090710-1/17A
090819-1/29A							x
100719-1/3A							x
100721-1/3A							x
100819-1/4A
171026-1/1			x
171004-1/1			x
171013-1/2			x
171013-1/4			x
060712-1/1			x
9006.-4/1							x
4070 E
980617-1/3a							x
910718-2/1A							x
840523-2/3			x
850617-1/1
17-16730-2A			x
