# Supplementary material for: Analysis of 44 Vibrio anguillarum genomes reveals high genetic diversity
Source: PeerJ. 2020 Dec 3;8:e10451. doi: 10.7717/peerj.10451 (PMC7719292; doi:10.7717/peerj.10451)
Supplement: Supplemental Information 5 [file peerj-08-10451-s005.xlsx]

## Sheet: Chromosome I
	0 = Absent gene
	x = Presence gene
Putative virulence factors Chromosome I	Gene tag
		131108-2/1	17-16730-2A	090707-1/1A	090710-1/17A	090819-1/28A	090819-1/29A	060712-1/1	060721-1/1B	090602-1/12	090519-1/13A	090602-1/6B	040714-1/4C	040714-1/1D	030905-1/1A	030305-1/5	040809-1/2A	040915-1/1B	090707-1/2A	100721-1/3A	100719-1/4A	100719-1/3A	100819-1/4A	4070 E	9006.-4/1	171124-1/1A	090903-1/2B	130829-1/3A	840613-2/1	ATTC 43306	950810-4/1	178581-2	171026-1/1	840523-2/3	990909-1/2A	920619-1/1	891221-1/1	980617-1/3a	910718-2/1A	850617-1/1	131108-2/1	171004-1/1	171013-1/4	171013-1/2	150811-1/228H	150312-1/1
Vanchrobactin biosynthesis and iron transport
vabA-2,3-dihydro-2,3-dihydroxybenzoate dehydrogenase	VAA_RS10155	x	x	x	x	x	x	x	x	x	x	x	x	x	x	x	x	x	x	x	x	x	x	x	x	x	x	x	x	x	x	x	x	x	x	x	x	x	x	x	x	x	x	x	x	x
vabB -isochorismate synthase	VAA_RS10160	x	x	x	x	x	x	x	x	x	x	x	x	x	x	x	x	x	x	x	x	x	x	x	x	x	x	x	x	x	x	x	x	x	x	x	x	x	x	x	x	x	x	x	x	x
vabC 2,3-dihydroxybenzoate-AMP ligase	VAA_RS10165	x	x	x	x	x	x	x	x	x	x	x	x	x	x	x	x	x	x	x	x	x	x	x	x	x	x	x	x	x	x	x	x	x	x	x	x	x	x	x	x	x	x	x	x	x
vabD -isochorismatas	VAA_RS10170	x	x	x	x	x	x	x	x	x	x	x	x	x	x	x	x	x	x	x	x	x	x	x	x	x	x	x	x	x	x	x	x	x	x	x	x	x	x	x	x	x	x	x	x	x
vabE -hypothetical protein	VAA_RS10190	x	x	x	x	x	x	x	x	x	x	x	x	x	x	x	x	x	x	x	x	x	x	x	x	x	x	x	x	x	x	x	x	x	x	x	x	x	x	x	x	x	x	x	x	x
MotA	VAA_RS08005	x	x	x	x	x	x	x	x	x	x	x	x	x	x	x	x	x	x	x	x	x	x	x	x	x	x	x	x	x	x	x	x	x	x	x	x	x	x	x	x	x	x	x	x	x
TolQ	VAA_RS08010	x	x	x	x	x	x	x	x	x	x	x	x	x	x	x	x	x	x	x	x	x	x	x	x	x	x	x	x	x	x	x	x	x	x	x	x	x	x	x	x	x	x	x	x	x
ExbD	VAA_RS08015	x	x	x	x	x	x	x	x	x	x	x	x	x	x	x	x	x	x	x	x	x	x	x	x	x	x	x	x	x	x	x	x	x	x	x	x	x	x	x	x	x	x	x	x	x
TonB2	VAA_RS08020	x	x	x	x	x	x	x	x	x	x	x	x	x	x	x	x	x	x	x	x	x	x	x	x	x	x	x	x	x	x	x	x	x	x	x	x	x	x	x	x	x	x	x	x	x
TRP	VAA_RS08025	x	x	x	x	x	x	x	x	x	x	x	x	x	x	x	x	x	x	x	x	x	x	x	x	x	x	x	x	x	x	x	x	x	x	x	x	x	x	x	x	x	x	x	x	x
exbD	VAA_RS07395	x	x	x	x	x	x	x	x	x	x	x	x	x	x	x	x	x	x	x	x	x	x	x	x	x	x	x	x	x	x	x	x	x	x	x	x	x	x	x	x	x	x	x	x	x
Biopolymer transporter ExbB	VAA_RS07400	x	x	x	x	x	x	x	x	x	x	x	x	x	x	x	x	x	x	x	x	x	x	x	x	x	x	x	x	x	x	x	x	x	x	x	x	x	x	x	x	x	x	x	x	x
TonB1	VAA_RS07405	x	x	x	x	x	x	x	x	x	x	x	x	x	x	x	x	x	x	x	x	x	x	x	x	x	x	x	x	x	x	x	x	x	x	x	x	x	x	x	x	x	x	x	x	x
fur	VAA_RS05270	x	x	x	x	x	x	x	x	x	x	x	x	x	x	x	x	x	x	x	x	x	x	x	x	x	x	x	x	x	x	x	x	x	x	x	x	x	x	x	x	x	x	x	x	x
Piscibactin biosynthesis (irpang)
araC1	AEZB01000030.1	0	0	x	x	x	x	0	x	0	x	x	x	x	0	x	x	x	x	x	0	x	x	x	x	0	x	0	x	x	x	0	0	0	0	0	0	x	x	0	0	0	0	0	x	0
araC2	AEZB01000030.1	0	0	x	x	x	x	0	x	0	x	x	x	x	0	x	x	x	x	x	0	x	x	x	x	0	x	0	x	x	x	0	0	0	0	0	0	x	x	0	0	0	0	0	x	0
frpA	AEZB01000030.1	0	0	x	x	x	x	0	x	0	x	x	x	x	0	x	x	x	x	x	0	x	x	x	x	0	x	0	x	x	x	0	0	0	0	0	0	x	x	0	0	0	0	0	x	0
Irp1	AEZB01000030.1	0	0	x	x	x	x	0	x	0	x	x	x	x	0	x	x	x	x	x	0	x	x	x	x	0	x	0	x	x	x	0	0	0	0	0	0	x	x	0	0	0	0	0	x	0
Irp2	AEZB01000030.1	0	0	x	x	x	x	0	x	0	x	x	x	x	0	x	x	x	x	x	0	x	x	x	x	0	x	0	x	x	x	0	0	0	0	0	0	x	x	0	0	0	0	0	x	0
Irp3	AEZB01000030.1	0	0	x	x	x	x	0	x	0	x	x	x	x	0	x	x	x	x	x	0	x	x	x	x	0	x	0	x	x	x	0	0	0	0	0	0	x	x	0	0	0	0	0	x	0
Irp4	AEZB01000030.1	0	0	x	x	x	x	0	x	0	x	x	x	x	0	x	x	x	x	x	0	x	x	x	x	0	x	0	x	x	x	0	0	0	0	0	0	x	x	0	0	0	0	0	x	0
Irp5	AEZB01000030.1	0	0	x	x	x	x	0	x	0	x	x	x	x	0	x	x	x	x	x	0	x	x	x	x	0	x	0	x	x	x	0	0	0	0	0	0	x	x	0	0	0	0	0	x	0
Irp 8	AEZB01000030.1	0	0	x	x	x	x	0	x	0	x	x	x	x	0	x	x	x	x	x	0	x	x	x	x	0	x	0	x	x	x	0	0	0	0	0	0	x	x	0	0	0	0	0	x	0
Irp9	AEZB01000030.1	0	0	x	x	x	x	0	x	0	x	x	x	x	0	x	x	x	x	x	0	x	x	x	x	0	x	0	x	x	x	0	0	0	0	0	0	x	x	0	0	0	0	0	x	0
Heme transport
TonB	VAA_RS07420	x	x	x	x	x	x	x	x	x	x	x	x	x	x	x	x	x	x	x	x	x	x	0	x	x	x	x	x	x	x	x	x	x	x	x	x	x	x	x	x	x	x	x	x	x
HmuV	VAA_RS07380	x	x	x	x	x	x	x	x	x	x	x	x	x	x	x	x	x	x	x	x	x	x	x	x	x	x	x	x	x	x	x	x	x	x	x	x	x	x	x	x	x	x	x	x	x
HmuU	VAA_RS07385	x	x	x	x	x	x	x	x	x	x	x	x	x	x	x	x	x	x	x	x	x	x	x	x	x	x	x	x	x	x	x	x	x	x	x	x	x	x	x	x	x	x	x	x	x
HuvX	VAA_RS07410	x	x	x	x	x	x	x	x	x	x	x	x	x	x	x	x	x	x	x	x	x	x	x	x	x	x	x	x	x	x	x	x	x	x	x	x	x	x	x	x	x	x	x	x	x
HutZ	VAA_RS07415	x	x	x	x	x	x	x	x	x	x	x	x	x	x	x	x	x	x	x	x	x	x	x	x	x	x	x	x	x	x	x	x	x	x	x	x	x	x	x	x	x	x	x	x	x
Ferric enterobactin and ferric vanchrobactin transport
fvtA	VAA_RS10205	x	x	x	x	x	x	x	x	x	x	x	x	x	x	x	x	x	x	x	x	x	x	x	x	x	x	x	x	x	x	x	x	x	x	x	x	x	x	0	x	x	x	x	0	x
CirA	VAA_RS13085	x	x	x	x	x	x	x	x	x	x	x	x	x	x	x	x	x	x	x	x	x	x	x	x	x	x	x	x	x	x	x	x	x	x	x	x	x	x	x	x	x	x	x	x	x
LysR	VAA_RS13090	x	x	x	x	x	x	x	x	x	x	x	x	x	x	x	x	x	x	x	x	x	x	x	x	x	x	x	x	x	x	x	x	x	x	x	x	x	x	x	x	x	x	x	x	x
Ferrous and ferric transport
FeoA	VAA_RS05395	x	x	x	x	x	x	x	x	x	x	x	x	x	x	x	x	x	x	x	x	x	x	x	x	x	x	x	x	x	x	x	x	x	x	x	x	x	x	x	x	x	x	x	x	x
FeoB	VAA_RS05400	x	x	x	x	x	x	x	x	x	x	x	x	x	x	x	x	x	x	x	x	x	x	x	x	x	x	x	x	x	x	x	x	x	x	x	x	x	x	x	x	x	x	x	x	x
FeoC	VAA_RS05405	x	x	x	x	x	x	x	x	x	x	x	x	x	x	x	x	x	x	x	x	x	x	x	x	x	x	x	x	x	x	x	x	x	x	x	x	x	x	x	x	x	x	x	x	x
fbpA	VAA_RS12210	x	x	x	x	x	x	x	x	x	x	x	x	x	x	x	x	x	x	x	x	x	x	x	x	x	x	x	x	x	x	x	x	x	x	x	x	x	x	x	x	x	x	x	x	x
fbpB	VAA_RS08105	x	x	x	x	x	x	x	x	x	x	x	x	x	x	x	x	x	x	x	x	x	x	x	x	x	x	x	x	x	x	x	x	x	x	x	x	x	x	x	x	x	x	x	x	x
fbpB	VAA_RS12205	x	x	x	x	x	x	x	x	x	x	x	x	x	x	x	x	x	x	x	x	x	x	x	x	x	x	x	x	x	x	x	x	x	x	x	x	x	x	x	x	x	x	x	x	x
fbpC	VAA_RS08100	x	x	x	x	x	x	x	x	x	x	x	x	x	x	x	x	x	x	x	x	x	x	x	x	x	x	x	x	x	x	x	x	x	x	x	x	x	x	x	x	x	x	x	x	x
																																			x
Ferrichrome
ABC transporter	VAA_RS01745	x	x	x	x	x	x	x	x	x	x	x	x	x	x	x	x	x	x	x	x	x	x	x	x	x	x	x	x	x	x	x	x	x	x	x	x	x	x	x	x	x	x	x	x	x
TonB	VAA_RS01740	x	x	x	x	x	x	x	x	x	x	x	x	x	x	x	x	x	x	x	x	x	x	x	x	x	x	x	x	x	x	x	x	x	x	x	x	x	x	x	x	x	x	x	x	x
fhuB	VAA_RS01755	x	x	x	x	x	x	x	x	x	x	x	x	x	x	x	x	x	x	x	x	x	x	x	x	x	x	x	x	x	x	x	x	x	x	x	x	x	x	x	x	x	x	x	x	x
ABC transporter substrate bind prot	VAA_RS01750	x	x	x	x	x	x	x	x	x	x	x	x	x	x	x	x	x	x	x	x	x	x	x	x	x	x	x	x	x	x	x	x	x	x	x	x	x	x	x	x	x	x	x	x	x
Hemolysins
Putative hemolysin genes	VAA_RS03055	x	x	x	x	x	x	x	x	x	x	x	x	x	x	x	x	x	x	x	x	x	x	x	x	x	x	x	x	x	x	x	x	x	x	x	x	x	x	x	x	x	x	x	x	x
21-kDa hemolysin precursor gene	VAA_RS03840	x	x	x	x	x	x	x	x	x	x	x	x	x	x	x	x	x	x	x	x	x	x	x	x	x	x	x	x	x	x	x	x	x	x	x	x	x	x	x	x	x	x	x	x	x
Cobalt transporter	VAA_RS10475	x	x	x	x	x	x	x	x	x	x	x	x	x	x	x	x	x	x	x	x	x	x	x	x	x	x	x	x	x	x	x	x	x	x	x	x	x	x	x	x	x	x	x	x	x
Hemolysin1	VAA_RS06290	x	x	x	x	x	x	x	x	x	x	x	x	x	x	x	x	x	x	x	x	x	x	x	x	x	x	x	x	x	x	x	x	x	x	x	x	x	x	x	x	x	x	x	0	x
Delta-VPH	VAA_RS05900	x	x	x	x	x	x	x	x	x	x	x	x	x	x	x	x	x	x	x	x	x	x	x	x	x	x	x	x	x	x	x	x	x	x	x	x	x	x	x	x	x	x	x	x	x
Hemolysin2	VAA_RS13020	x	x	x	x	x	x	x	x	x	x	x	x	x	x	x	x	x	x	x	x	x	x	x	x	x	x	x	x	x	x	x	x	x	x	x	x	x	x	x	x	x	x	x	x	x
mltD	VAA_RS13020	x	x	x	x	x	x	x	x	x	x	x	x	x	x	x	x	x	x	x	x	x	x	x	x	x	x	x	x	x	0	x	x	x	0	x	x	x	x	x	0	x	x	x	x	x
RTX toxins
Peptidase C39	VAA_RS06885	x	x	x	x	x	x	x	x	x	x	x	0	0	x	x	x	x	x	x	x	x	x	x	x	x	x	x	x	x	x	x	x	x	x	x	x	x	x	x	x	x	x	x	x	x
HlyD	VAA_RS06890	x	x	x	x	x	x	x	x	x	x	x	x	x	x	x	x	x	x	x	x	x	x	x	x	x	x	x	x	x	x	x	x	x	x	x	x	x	x	x	x	x	x	x	x	x
Peptidase C39	VAA_RS06895	x	x	x	x	x	x	x	x	x	x	x	x	x	x	x	x	x	x	x	x	x	x	x	x	x	x	x	x	x	x	x	x	x	x	x	x	x	x	x	x	x	x	x	x	x
rtxhp	VAA_RS06900	x	x	x	x	x	x	x	x	x	x	x	0	0	x	x	x	x	x	x	x	x	x	x	x	x	x	x	x	x	x	x	x	x	x	x	x	x	x	x	x	x	x	x	x	x
RtxC	VAA_RS06905	x	x	x	x	x	x	x	x	x	x	x	x	x	x	x	x	x	x	x	x	x	x	x	x	x	x	x	x	x	x	x	x	x	x	x	x	x	x	x	x	x	x	x	x	x
Trimeric autotransporter adhesin (TAA)	VAA_RS06910	x	x	0	0	x	0	x	0	x	0	0	0	0	x	0	0	0	0	0	x	0	0	0	0	x	0	x	0	0	0	x	x	x	x	x	x	0	0	0	x	x	x	x	0	x
RTX toxin gene	VAA_RS08460	x	x	x	x	x	x	x	x	x	x	x	x	x	x	x	x	x	x	x	x	x	x	x	x	x	x	x	x	x	x	x	x	0	x	x	x	x	x	x	x	x	x	x	x	0
Secreted enzymes
Lysophospholipase L2 gene	VAA_RS00625	x	x	x	x	x	x	x	x	x	x	x	x	x	x	x	x	x	x	x	x	x	x	x	x	x	x	x	x	x	x	x	x	x	x	x	x	x	x	x	x	x	x	x	x	x
Motility and chemotaxis
Flagellin D	VAA_RS05095	x	x	x	x	x	x	x	x	x	x	x	x	x	x	x	x	x	x	x	x	x	x	x	x	x	x	x	x	x	x	x	x	x	x	x	x	x	x	x	x	x	x	x	x	x
Flagellin B	VAA_RS05100	x	x	x	x	x	x	x	x	x	x	x	x	x	x	x	x	x	x	x	x	x	x	x	x	x	x	x	x	x	x	x	x	x	x	x	x	x	x	x	x	x	x	x	x	x
FlaG	VAA_RS05105	x	x	x	x	x	x	x	x	x	x	x	x	x	x	x	x	x	x	x	x	x	x	x	x	x	x	x	x	x	x	x	x	x	x	x	x	x	x	x	x	x	x	x	x	x
FliD	VAA_RS05110	x	x	x	x	x	x	x	x	x	x	x	x	x	x	x	x	x	x	x	x	x	x	x	x	x	x	x	x	x	x	x	x	x	x	x	x	x	x	x	x	x	x	x	x	x
FliS	VAA_RS05120	x	x	x	x	x	x	x	x	x	x	x	x	x	x	x	x	x	x	x	x	x	x	x	x	x	x	x	x	x	x	x	x	x	x	x	x	x	x	x	x	x	x	x	x	x
Flis family	VAA_RS05125	x	x	x	x	x	x	x	x	x	x	x	x	x	x	x	x	x	x	x	x	x	x	x	x	x	x	x	x	x	x	x	x	x	x	x	x	x	x	x	x	x	x	x	x	x
Histidine kinase	VAA_RS05130	x	x	x	x	x	x	x	x	x	x	x	x	x	x	x	x	x	x	x	x	x	x	x	x	x	x	x	x	x	x	x	x	x	x	x	x	x	x	x	x	x	x	x	x	x
FleSQ	VAA_RS05135	x	x	x	x	x	x	x	x	x	x	x	x	x	x	x	x	x	x	x	x	x	x	x	x	x	x	x	x	x	x	x	x	x	x	x	x	x	x	x	x	x	x	x	x	x
FliE	VAA_RS05140	x	x	x	x	x	x	x	x	x	x	x	x	x	x	x	x	x	x	x	x	x	x	x	x	x	x	x	x	x	x	x	x	x	x	x	x	x	x	x	x	x	x	x	x	x
FlhB	VAA_RS05210	x	x	x	x	x	x	x	x	x	x	x	x	x	x	x	x	x	x	x	x	x	x	x	x	x	x	x	x	x	x	x	x	x	x	x	x	x	x	x	x	x	x	x	x	x
FliR	VAA_RS05205	x	x	x	x	x	x	x	x	x	x	x	x	x	x	x	x	x	x	x	x	x	x	x	x	x	x	x	x	x	x	x	x	x	x	x	x	x	x	x	x	x	x	x	x	x
FliQ	VAA_RS05200	x	x	x	x	x	x	x	x	x	x	x	x	x	x	x	x	x	x	x	x	x	x	x	x	x	x	x	x	x	x	x	x	x	x	x	x	x	x	x	x	x	x	x	x	x
FliP	VAA_RS05195	x	x	x	x	x	x	x	x	x	x	x	x	x	x	x	x	x	x	x	x	x	x	x	x	x	x	x	x	x	x	x	x	x	x	x	x	x	x	x	x	x	x	x	x	x
FliO	VAA_RS05190	x	x	x	x	x	x	x	x	x	x	x	x	x	x	x	x	x	x	x	x	x	x	x	x	x	x	x	x	x	x	x	x	x	x	x	x	x	x	x	x	x	x	x	x	x
FliN	VAA_RS05185	x	x	x	x	x	x	x	x	x	x	x	x	x	x	x	x	x	x	x	x	x	x	x	x	x	x	x	x	x	x	x	x	x	x	x	x	x	x	x	x	x	x	x	x	x
FliM	VAA_RS05180	x	x	x	x	x	x	x	x	x	x	x	x	x	x	x	x	x	x	x	x	x	x	x	x	x	x	x	x	x	x	x	x	x	x	x	x	x	x	x	x	x	x	x	x	x
FliL	VAA_RS05175	x	x	x	x	x	x	x	x	x	x	x	x	x	x	x	x	x	x	x	x	x	x	x	x	x	x	x	x	x	x	x	x	x	x	x	x	x	x	x	x	x	x	x	x	x
FliK	VAA_RS05170	x	x	x	x	x	x	x	x	x	x	x	x	x	x	x	x	x	x	x	x	x	x	x	x	x	x	x	x	x	x	x	x	x	x	x	x	x	x	x	x	x	x	x	x	x
FliJ	VAA_RS05165	x	x	x	x	x	x	x	x	x	x	x	x	x	x	x	x	x	x	x	x	x	x	x	x	x	x	x	x	x	x	x	x	x	x	x	x	x	x	x	x	x	x	x	x	x
FliH	VAA_RS05155	x	x	x	x	x	x	x	x	x	x	x	x	x	x	x	x	x	x	x	x	x	x	x	x	x	x	x	x	x	x	x	x	x	x	x	x	x	x	x	x	x	x	x	x	x
FliG	VAA_RS05150	x	x	x	x	x	x	x	x	x	x	x	x	x	x	x	x	x	x	x	x	x	x	x	x	x	x	x	x	x	x	x	x	x	x	x	x	x	x	x	x	x	x	x	x	x
FliF	VAA_RS05145	x	x	x	x	x	x	x	x	x	x	x	x	x	x	x	x	x	x	x	x	x	x	x	x	x	x	x	x	x	x	x	x	x	x	x	x	x	x	x	x	x	x	x	0	x
FlgL	VAA_RS04830	x	x	x	x	x	x	x	x	x	x	x	x	x	x	x	x	x	x	x	x	x	x	x	x	x	x	x	x	x	x	x	x	x	x	x	x	x	x	x	x	x	x	x	x	x
FlgK	VAA_RS04825	x	x	x	x	x	x	x	x	x	x	x	x	x	x	x	x	x	x	x	x	x	x	x	x	x	x	x	x	x	x	x	x	x	x	x	x	x	x	x	x	x	x	x	x	x
FlgJ	VAA_RS04820	x	x	x	x	x	x	x	x	x	x	x	x	x	x	x	x	x	x	x	x	x	x	x	x	x	x	x	x	x	x	x	x	x	x	x	x	x	x	x	x	x	x	x	x	x
FlgI	VAA_RS04815	x	x	x	x	x	x	x	x	x	x	x	x	x	x	x	x	x	x	x	x	x	x	x	x	x	x	x	x	x	x	x	x	x	x	x	x	x	x	x	x	x	x	x	x	x
Flagellar basal body L-ring	VAA_RS04810	x	x	x	x	x	x	x	x	x	x	x	x	x	x	x	x	x	x	x	x	x	x	x	x	x	x	x	x	x	x	x	x	x	x	x	x	x	x	x	x	x	x	x	x	x
FlgG	VAA_RS04805	x	x	x	x	x	x	x	x	x	x	x	x	x	x	x	x	x	x	x	x	x	x	x	x	x	x	x	x	x	x	x	x	x	x	x	x	x	x	x	x	x	x	x	x	x
Flgf	VAA_RS04800	x	x	x	x	x	x	x	x	x	x	x	x	x	x	x	x	x	x	x	x	x	x	x	x	x	x	x	x	x	x	x	x	x	x	x	x	x	x	x	x	x	x	x	x	x
Pseudo	VAA_RS04795	x	x	x	x	x	x	x	x	x	x	x	x	x	x	x	x	x	x	x	x	x	x	x	x	x	x	x	x	x	x	x	x	x	x	x	x	x	x	x	x	x	x	x	x	x
FlgD	VAA_RS04790	x	x	x	x	x	x	x	x	x	x	x	x	x	x	x	x	x	x	x	x	x	x	x	x	x	x	x	x	x	x	x	x	x	x	x	x	x	x	x	x	x	x	x	x	x
FlgC	VAA_RS04785	x	x	x	x	x	x	x	x	x	x	x	x	x	x	x	x	x	x	x	x	x	x	x	x	x	x	x	x	x	x	x	x	x	x	x	x	x	x	x	x	x	x	x	x	x
FlgB	VAA_RS04780	x	x	x	x	x	x	x	x	x	x	x	x	x	x	x	x	x	x	x	x	x	x	x	x	x	x	x	x	x	x	x	x	x	x	x	x	x	x	x	x	x	x	x	x	x
FlhA	VAA_RS05435	x	x	x	x	x	x	x	x	x	x	x	x	x	x	x	x	x	x	x	x	x	x	x	x	x	x	x	x	x	x	x	x	x	x	x	x	x	x	x	x	x	x	x	x	x
FliL	VAA_RS00500	x	x	x	x	x	x	x	x	x	x	x	x	x	x	x	x	x	x	x	x	x	x	x	x	x	x	x	x	x	x	x	x	x	x	x	x	x	x	x	x	x	x	x	x	x
rpoH	VAA_RS00515	x	x	x	x	x	x	x	x	x	x	x	x	x	x	x	x	x	x	x	x	x	x	x	x	x	x	x	x	x	x	x	x	x	x	x	x	x	x	x	x	x	x	x	x	x
rpoN	VAA_RS03240	x	x	x	x	x	x	x	x	x	x	x	x	x	x	x	x	x	x	x	x	x	x	x	x	x	x	x	x	x	x	x	x	x	x	x	x	x	x	x	x	x	x	x	x	x
motY	VAA_RS10255	x	x	x	x	x	x	x	x	x	x	x	x	x	x	x	x	x	x	x	x	x	x	x	x	x	x	x	x	x	x	x	x	x	x	x	x	x	x	x	x	x	x	x	x	x
motB	VAA_RS10820	x	x	x	x	x	x	x	x	x	x	x	x	x	x	x	x	x	x	x	x	x	x	x	x	x	x	x	x	x	x	x	x	x	x	x	x	x	x	x	x	x	x	x	x	x
PomA	VAA_RS10825	x	x	x	x	x	x	x	x	x	x	x	x	x	x	x	x	x	x	x	x	x	x	x	x	x	x	x	x	x	x	x	x	x	x	x	x	x	x	x	x	x	x	x	x	x
Methyl-accepting chemotaxis gene (Macp1)	VAA_RS07655	x	x	x	x	x	x	x	x	x	x	x	x	x	x	x	x	x	x	x	x	x	x	x	x	x	x	x	x	x	x	x	x	x	x	x	x	x	x	x	x	x	x	x	x	x
Methyl-accepting chemotaxis gene (Macp2)	VAA_RS07535	x	x	x	x	x	x	x	x	x	x	x	x	x	x	x	x	x	x	x	x	x	x	x	x	x	x	x	x	x	x	x	x	x	x	x	x	x	x	x	x	x	x	x	x	x
Methyl-accepting chemotaxis gene (Macp3)	VAA_RS07365	x	x	x	x	x	x	x	x	x	x	x	x	x	x	x	x	x	x	x	x	x	x	x	x	x	x	x	x	x	x	x	x	x	x	x	x	x	x	x	x	x	x	x	x	x
Methyl-accepting chemotaxis gene (Macp4)	VAA_RS07325	x	x	x	x	x	x	x	x	x	x	x	x	x	x	x	x	x	x	x	x	x	x	x	x	x	x	x	x	x	x	x	x	x	x	x	x	x	x	x	x	x	x	x	x	x
Methyl-accepting chemotaxis gene (Macp5)	VAA_RS06835	x	x	x	x	x	x	x	x	x	x	x	x	x	x	x	x	x	x	x	x	x	x	x	x	x	x	x	x	x	x	x	x	x	x	x	x	x	x	x	x	x	x	x	x	x
Methyl-accepting chemotaxis gene (Macp6)	VAA_RS06440	x	x	x	x	x	x	x	x	x	x	x	x	x	x	x	x	x	x	x	x	x	x	x	x	x	x	x	x	x	x	x	x	x	x	x	x	x	x	x	x	x	x	x	x	x
Methyl-accepting chemotaxis gene (Macp7)	VAA_RS06250	x	x	x	x	x	x	x	x	x	x	x	x	x	x	x	x	x	x	x	x	x	x	x	x	x	x	x	x	x	x	x	x	x	x	x	x	x	x	x	x	x	x	x	x	x
Methyl-accepting chemotaxis gene (CheD)	VAA_RS07550	x	x	x	x	x	x	x	x	x	x	x	x	x	x	x	x	x	x	x	x	x	x	x	x	x	x	x	x	x	x	x	x	x	x	x	x	x	x	x	x	x	x	x	x	x
Methyl-accepting chemotaxis gene (Macp8)	VAA_RS08065	x	x	x	x	x	x	x	x	x	x	x	x	x	x	x	x	x	x	x	x	x	x	x	x	x	x	x	x	x	x	x	x	x	x	x	x	x	x	x	x	x	x	x	x	x
Methyl-accepting chemotaxis gene (Macp9)	VAA_RS13880	x	x	x	x	x	x	x	x	x	x	x	x	x	x	x	x	x	x	x	x	x	x	x	x	x	x	x	x	x	x	x	x	x	x	x	x	x	x	x	x	x	x	x	x	x
Methyl-accepting chemotaxis gene (Macp10)	VAA_RS07570	x	x	x	x	x	x	x	x	x	x	x	x	x	x	x	x	x	x	x	x	x	x	x	x	x	x	x	x	x	x	x	x	x	x	x	x	x	x	x	x	x	x	x	x	x
Methyl-accepting chemotaxis gene (CheR)	VAA_RS07545	x	x	x	x	x	x	x	x	x	x	x	x	x	x	x	x	x	x	x	x	x	x	x	x	x	x	x	x	x	x	x	x	x	x	x	x	x	x	x	x	x	x	x	x	x
Methyl-accepting chemotaxis gene (Macp11)	VAA_RS07515	x	x	x	x	x	x	x	x	x	x	x	x	x	x	x	x	x	x	x	x	x	x	x	x	x	x	x	x	x	x	x	x	x	x	x	x	x	x	x	x	x	x	x	x	x
Methyl-accepting chemotaxis gene (Macp12)	VAA_RS07490	x	x	x	x	x	x	x	x	x	x	x	x	x	x	x	x	x	x	x	x	x	x	x	x	x	x	x	x	x	x	x	x	x	x	x	x	x	x	x	x	x	x	x	x	x
Methyl-accepting chemotaxis gene (Macp13)	VAA_RS06880	x	x	x	x	x	x	x	x	x	x	x	x	x	x	x	x	x	x	x	x	x	x	x	x	x	x	x	x	x	x	x	x	x	x	x	x	x	x	x	x	x	x	x	x	x
Methyl-accepting chemotaxis gene (Macp14)	VAA_RS06390	x	x	x	x	x	x	x	x	x	x	x	x	x	x	x	x	x	x	x	x	x	x	x	x	x	x	x	x	x	x	x	x	x	x	x	x	x	x	x	x	x	x	x	x	x
Methyl-accepting chemotaxis gene (Macp15)	VAA_RS05020	x	x	x	x	x	x	x	x	x	x	x	x	x	x	x	x	x	x	x	x	x	x	x	x	x	x	x	x	x	x	x	x	x	x	x	x	x	x	x	x	x	x	x	x	x
Methyl-accepting chemotaxis gene (Macp16)	VAA_RS03730	x	x	x	x	x	x	x	x	x	x	x	x	x	x	x	x	x	x	x	x	x	x	x	x	x	x	x	x	x	x	x	x	x	x	x	x	x	x	x	x	x	x	x	x	x
Methyl-accepting chemotaxis gene (Macp17)	VAA_RS02235	x	x	x	x	x	x	x	x	x	x	x	x	x	x	x	x	x	x	x	x	x	x	x	x	x	x	x	x	x	x	x	x	x	x	x	x	x	x	x	x	x	x	x	x	x
Methyl-accepting chemotaxis gene (Macp18)	VAA_RS08785	x	x	x	x	x	x	x	x	x	x	x	x	x	x	x	x	x	x	x	x	x	x	x	x	x	x	x	x	x	x	x	x	x	x	x	x	x	x	x	x	x	x	x	x	x
Methyl-accepting chemotaxis gene (Macp19)	VAA_RS07510	x	x	x	x	x	x	x	x	x	x	x	x	x	x	x	x	x	x	x	x	x	x	x	x	x	x	x	x	x	x	x	x	x	x	x	x	x	x	x	x	x	x	x	x	x
Methyl-accepting chemotaxis gene (Macp20)	VAA_RS06640	x	x	x	x	x	x	x	x	x	x	x	x	x	x	x	x	x	x	x	x	x	x	x	x	x	x	x	x	x	x	x	x	x	x	x	x	x	x	x	x	x	x	x	x	x
Type IV pilus
Type IV pilin	VAA_RS10965	x	x	x	x	x	x	x	x	x	x	x	x	x	x	x	x	x	x	x	x	x	x	x	x	x	x	x	x	x	x	x	x	x	x	x	x	x	x	x	x	x	x	x	x	x
pilPC	VAA_RS10975	x	x	x	x	x	x	x	x	x	x	x	x	x	x	x	x	x	x	x	x	x	x	x	x	x	x	x	x	x	x	x	x	x	x	x	x	x	x	x	x	x	x	x	x	x
Prepilin-type cleavage/methylation	VAA_RS10985	x	x	x	x	x	x	x	x	x	x	x	x	x	x	x	x	x	x	x	x	x	x	x	x	x	x	x	x	x	x	x	x	x	x	x	x	x	x	x	x	x	x	x	x	x
Putative type IV pilin gene	VAA_RS10980	x	x	x	x	x	x	x	x	x	x	x	x	x	x	x	x	x	x	x	x	x	x	x	x	x	x	x	x	x	x	x	x	x	x	x	x	x	x	x	x	x	x	x	x	x
PilT	VAA_RS13135	x	x	x	x	x	x	x	x	x	x	x	x	x	x	x	x	x	x	x	x	x	x	x	x	x	x	x	x	x	x	x	x	x	x	x	x	x	x	x	x	x	x	x	x	x
PilE	VAA_RS13140	x	x	x	x	x	x	x	x	x	x	x	x	x	x	x	x	x	x	x	x	x	x	x	x	x	x	x	x	x	x	x	x	x	x	x	x	x	x	x	x	x	x	x	x	x
PilW	VAA_RS06990	x	x	x	x	x	x	x	x	x	x	x	x	x	x	x	x	x	x	x	x	x	x	x	x	x	x	x	x	x	x	x	x	x	x	x	x	x	x	x	x	x	x	x	x	x
Multimodular transpeptidase	VAA_RS02700	x	x	x	x	x	x	x	x	x	x	x	x	x	x	x	x	x	x	x	x	x	x	x	x	x	x	x	x	x	x	x	x	x	x	x	x	x	x	x	x	x	x	x	x	x
Multimodular transpeptidase-transglycosylase gene	VAA_RS12255	x	x	x	x	x	x	x	x	x	x	x	x	x	x	x	x	x	x	x	x	x	x	x	x	x	x	x	x	x	x	x	x	x	x	x	x	x	x	x	x	x	x	x	x	x
PilM	VAA_RS02705	x	x	x	x	x	x	x	x	x	x	x	x	x	x	x	x	x	x	x	x	x	x	x	x	x	x	x	x	x	x	x	x	x	x	x	x	x	x	x	x	x	x	x	x	x
PilN	VAA_RS02710	x	x	x	x	x	x	x	x	x	x	x	x	x	x	x	x	x	x	x	x	x	x	x	x	x	x	x	x	x	x	x	x	x	x	x	x	x	x	x	x	x	x	x	x	x
Fimbrial protein1	VAA_RS02715	x	x	x	x	x	x	x	x	x	x	x	x	x	x	x	x	x	x	x	x	x	x	x	x	x	x	x	x	x	x	x	x	x	x	x	x	x	x	x	x	x	x	x	x	x
Fimbrial protein2	VAA_RS02720	x	x	x	x	x	x	x	x	x	x	x	x	x	x	x	x	x	x	x	x	x	x	x	x	x	x	x	x	x	x	x	x	x	x	x	x	x	x	x	x	x	x	x	x	x
Fimbrial protein3	VAA_RS02725	x	x	x	x	x	x	x	x	x	x	x	x	x	x	x	x	x	x	x	x	x	x	x	x	x	x	x	x	x	x	x	x	x	x	x	x	x	x	x	x	x	x	x	x	x
Mannose-sensitive haemagglutinin (Msh) type IV pilus
MshQ	VAA_RS13490	x	x	0	0	x	0	x	0	x	0	0	0	0	x	0	0	0	0	0	x	0	0	0	0	x	0	x	0	0	0	x	x	x	x	x	x	0	0	0	x	x	x	x	0	x
Mshpc1	VAA_RS13495	x	x	x	x	x	x	x	x	x	x	x	x	x	x	x	x	x	x	x	x	x	x	x	x	x	x	x	x	x	x	x	x	x	x	x	x	x	x	x	x	x	x	x	x	x
MshO	VAA_RS13500	x	x	x	x	x	x	x	x	x	x	x	x	x	x	x	x	x	x	x	x	x	x	x	x	x	x	x	x	x	x	x	x	x	x	x	x	x	x	x	x	x	x	x	x	x
MshD	VAA_RS13505	x	x	x	x	x	x	x	x	x	x	x	x	x	x	x	x	x	x	x	x	x	x	x	x	x	x	x	x	x	x	x	x	x	x	x	x	x	x	x	x	x	x	x	x	x
MshC	VAA_RS13510	0	0	0	0	0	x	0	0	0	0	0	x	x	0	0	0	0	0	0	0	0	0	0	0	0	0	0	0	0	x	0	0	0	0	0	0	0	0	0	0	x	0	0	0	0
MshA	VAA_RS13515	x	x	x	x	x	x	x	x	x	x	x	0	0	x	x	x	x	x	x	x	x	x	x	x	x	x	x	x	x	x	x	x	x	x	x	x	x	x	x	x	x	x	x	x	x
MshB	VAA_RS13520	x	x	x	x	x	x	x	x	x	x	x	x	x	x	x	x	x	x	x	x	x	x	x	x	x	x	x	x	x	x	x	x	x	x	x	x	x	x	x	x	x	x	x	x	x
Mshpc2	VAA_RS13525	x	x	x	x	x	x	x	x	x	x	x	x	x	x	x	x	x	x	x	x	x	x	x	x	x	x	x	x	x	x	x	x	x	x	x	x	x	x	x	x	x	x	x	x	x
MshG	VAA_RS13530	x	x	x	x	x	x	x	x	x	x	x	x	x	x	x	x	x	x	x	x	x	x	x	x	x	x	x	x	x	x	x	x	x	x	x	x	x	x	x	x	x	x	x	x	x
MshE	VAA_RS13535	x	x	x	x	x	x	x	x	x	x	x	x	x	x	x	x	x	x	x	x	x	x	x	x	x	x	x	x	x	x	x	x	x	x	x	x	x	x	x	x	x	x	x	x	x
Mshpc3	VAA_RS13540	x	x	x	x	x	x	x	x	x	x	x	x	x	x	x	x	x	x	x	x	x	x	x	x	x	x	x	x	x	x	x	x	x	x	x	x	x	x	x	x	x	x	x	x	x
MshM	VAA_RS13545	x	x	x	x	x	x	x	x	x	x	x	x	x	x	x	x	x	x	x	x	x	x	x	x	x	x	x	x	x	x	x	x	x	x	x	x	x	x	x	x	x	x	x	x	x
MshL	VAA_RS13550	x	x	x	x	x	x	x	x	x	x	x	x	x	x	x	x	x	x	x	x	x	x	x	x	x	x	x	x	x	x	x	x	x	x	x	x	x	x	x	x	x	x	x	x	x
MshK	VAA_RS13555	x	x	x	x	x	x	x	x	x	x	x	x	x	x	x	x	x	x	x	x	x	x	x	x	x	x	x	x	x	x	x	x	x	x	x	x	x	x	x	x	x	x	x	x	x
MshJ	VAA_RS13560	x	x	x	x	x	x	x	x	x	x	x	x	x	x	x	x	x	x	x	x	x	x	x	x	x	x	x	x	x	x	x	x	x	x	x	x	x	x	x	x	x	x	x	x	x
Mshhp	VAA_RS13565	x	x	x	x	x	x	x	x	x	x	x	x	x	x	x	x	x	x	x	x	x	x	x	x	x	x	x	x	x	x	x	x	x	x	x	x	x	x	x	x	x	x	x	x	x
CsrD	VAA_RS13570	x	x	x	x	x	x	x	x	x	x	x	x	x	x	x	x	x	x	x	x	x	x		x	x	x	x	x	x	x	x	x	x	x	x	x	x	x	x	x	x	x	x	x	x
Type VI secretion system (vtsA-vtsH system I)
Protein kinase	VAA_RS07205	x	x	x	x	x	x	x	x	x	x	x	x	x	x	x	x	x	x	x	x	x	x	x	x	x	x	x	x	x	x	x	x	x	x	x	x	x	x	x	x	x	x	x	x	x
Hypothetical protein	VAA_RS07200	x	x	x	x	x	x	x	x	x	x	x	x	x	x	x	x	x	x	x	x	x	x	x	x	x	x	x	x	x	x	x	x	x	x	x	x	x	x	x	x	x	x	x	x	x
Membrane protein	VAA_RS07195	x	x	x	x	x	x	x	x	x	x	x	x	x	x	x	x	x	x	x	x	x	x	x	x	x	x	x	x	x	x	x	x	x	x	x	x	x	x	x	x	x	x	x	x	0
Type VI secretion protein	VAA_RS07190	x	x	x	x	x	x	x	x	x	x	x	x	x	x	x	x	x	x	x	x	x	x	x	x	x	x	x	x	x	x	x	x	x	x	x	x	x	x	x	x	x	x	x	x	x
Type VI secretion system-associated lipoprotein	VAA_RS07185	x	x	x	x	x	x	x	x	x	x	x	x	x	x	x	x	x	x	x	x	x	x	x	x	x	x	x	x	x	x	x	x	x	x	x	x	x	x	x	x	x	x	x	x	x
FHA domain-containing protein	VAA_RS07180	x	x	x	x	x	x	x	x	x	x	x	x	x	x	x	x	x	x	x	x	x	x	x	x	x	x	x	x	x	x	x	x	x	x	x	x	x	x	x	x	x	x	x	x	x
Hypothetical protein2	VAA_RS07175	x	x	x	x	x	x	x	x	x	x	x	x	x	x	x	x	x	x	x	x	x	x	x	x	x	x	x	x	x	x	x	x	x	x	x	x	x	x	x	x	x	x	x	x	x
Hypothetical protein3	VAA_RS07170	x	x	x	x	x	x	x	x	x	x	x	x	x	x	x	x	x	x	x	x	x	x	x	x	x	x	x	x	x	x	x	x	x	x	x	x	x	x	x	x	x	x	x	x	x
MFS transporter	VAA_RS07165	x	x	x	x	x	x	x	x	x	x	x	x	x	x	0	x	x	x	x	x	x	x	x	x	x	x	x	x	x	x	x	x	x	x	x	x	x	x	x	x	x	x	x	x	x
D-Ala D-Ala ligase	VAA_RS07160	x	x	x	x	x	x	x	x	x	x	x	x	x	x	x	x	x	x	x	x	x	x	x	x	x	x	x	x	x	x	x	x	x	x	x	x	x	x	x	x	x	x	x	x	x
ClpV1	VAA_RS07155	x	x	x	x	x	x	x	x	x	x	x	x	x	x	x	x	x	x	x	x	x	x	x	x	x	x	x	x	x	x	x	x	x	x	x	x	x	x	x	x	x	x	x	x	x
Hypothetical protein4	VAA_RS07150	x	x	x	x	x	x	x	x	x	x	x	x	x	x	x	x	x	x	x	x	x	x	x	x	x	x	x	x	x	x	x	x	x	x	x	x	x	x	x	x	x	x	x	x	x
Type VI secretion protein2	VAA_RS07140	x	x	x	x	x	x	x	x	x	x	x	x	x	x	x	x	x	x	x	x	x	x	x	x	x	x	x	x	x	x	x	x	x	x	x	x	x	x	x	x	x	x	x	x	x
Type VI secretion protein3	VAA_RS07135	x	x	x	x	x	x	x	x	x	x	x	x	x	x	x	x	x	x	x	x	x	x	x	x	x	x	x	x	x	x	x	x	x	x	x	x	x	x	x	x	x	x	x	x	x
EvpB	VAA_RS07130	x	x	x	x	x	x	x	x	x	x	x	x	x	x	x	x	x	x	x	x	x	x	x	x	x	x	x	x	x	x	x	x	x	x	x	x	x	x	x	x	x	x	x	x	x
Type VI secretion protein4	VAA_RS07125	x	x	x	x	x	x	x	x	x	x	x	x	x	x	x	x	x	x	x	x	x	x	x	x	x	x	x	x	x	x	x	x	x	x	x	x	x	x	x	x	x	x	x	x	x
Hypothetical protein5	VAA_RS07120	x	x	x	x	x	x	x	x	x	x	x	x	x	x	x	x	x	x	x	x	x	x	x	x	x	x	x	x	x	x	x	x	x	x	x	x	x	x	x	x	x	x	x	x	x
Type VI secretion protein5	VAA_RS07115	x	x	x	x	x	x	x	x	x	x	x	x	x	x	x	x	x	x	x	x	x	x	x	x	x	x	x	x	x	x	x	x	x	x	x	x	x	x	x	x	x	x	x	x	x
Rhs	VAA_RS07110	x	x	x	x	x	x	x	x	x	x	x	x	x	x	x	x	x	x	x	x	x	x	x	x	x	x	x	x	x	x	x	x	x	x	x	x	x	x	x	x	x	x	x	x	x
Quorum sensing
luxS	VAA_RS12455	x	x	x	x	x	x	x	x	x	x	x	x	x	x	x	x	x	x	x	x	x	x	x	x	x	x	x	x	x	x	x	x	x	x	x	x	x	x	x	x	x	x	x	x	x
Helix-turn-helix transcriptional regulator	VAA_RS13580	x	x	x	x	x	x	x	x	x	x	x	x	x	x	x	x	x	x	x	x	x	x	x	x	x	x	x	x	x	x	x	x	x	x	x	x	x	x	x	x	x	x	x	x	x
luxUO	VAA_RS10125	x	x	x	x	x	x	x	x	x	x	x	x	x	x	x	x	x	x	x	x	x	x	x	x	x	x	x	x	x	x	x	x	x	x	x	x	x	x	x	x	x	x	x	x	x
luxUO	VAA_RS10130	x	x	x	x	x	x	x	x	x	x	x	x	x	x	x	x	x	x	x	x	x	x	x	x	x	x	x	x	x	x	x	x	x	x	x	x	x	x	x	x	x	x	x	x	x
luxR	VAA_RS12330	x	x	x	x	x	x	x	x	x	x	x	x	x	x	x	x	x	x	x	x	x	x	x	x	x	x	x	x	x	x	x	x	x	x	x	x	x	x	x	x	x	x	x	x	x
vanT	VAA_RS15210	x	x	x	x	x	x	x	x	x	x	x	x	x	x	x	x	x	x	x	x	x	x	x	x	x	x	x	x	x	x	x	x	x	x	x	x	x	x	x	x	x	x	x	x	x
Regulators
DNA-binding protein H-NS gene	VAA_RS09270	x	x	x	x	x	x	x	x	x	x	x	x	x	x	x	x	x	x	x	x	x	x	x	x	x	x	x	x	x	x	x	x	x	x	x	x	x	x	x	x	x	x	x	x	0
hfq	VAA_RS13825	x	x	x	x	x	x	x	x	x	x	x	x	x	x	x	x	x	x	x	x	x	x	x	x	x	x	x	x	x	x	x	x	x	x	x	x	x	x	x	x	x	x	x	x	x

## Sheet: Chromosome II
Putative virulence factors Chromosome II	Gene tag
		131108-2/1	130829-1/3A	150312-1/1	150811-1/228H	171004-1/1	100721-1/3A	100819-1/4A	100719-1/4A	100719-1/3A	090903-1/2B	090819-1/29A	171013-1/2	171013-1/4	171026-1/1	171124-1/1A	178581-2	840523-2/3	840613-2/1	850617-1/1	891221-1/1	910718-2/1A	17-16730-2A	4070 E	9006.-4/1	030305-1/5	030905-1/1A	040714-1/1D	040714-1/4C	040809-1/2A	040915-1/1B	060712-1/1	060721-1/1B	090519-1/13A	090602-1/6B	090602-1/12	090707-1/1A	090707-1/2A	090710-1/17A	090819-1/28A	920619-1/1	950810-4/1	980617-1/3A	ATCC 43306	990909-1/2A
Anguibactin biosynthesis and iron transport
Utilization protein for unknown catechol siderophore	VAA_RS07300	x	x	x	x	x	x	x	x	x	x	x	x	x	x	x	x	x	x	x	x	x	x	x	x	0	x	x	x	x	x	x	x	x	x	x	x	x	x	x	x	x	x	x	x
Heme transport
huvA gene	AJ306289.1	x	x	x	x	x	x	x	x	x	x	x	x	x	x	x	x	x	x	x	x	0	x	0	x	x	x	x	x	x	x	x	x	x	0	x	0	x	x	x	x	x	0	x	0
huvS gene	AM042548.1	0	0	0	0	0	0	0	0	0	0	0	0	0	0	0	0	0	x	0	0	x	0	x	x	0	0	0	0	0	0	0	x	0	x	0	x	x	0	0	0	0	x	0	x
Ferric enterobactin and ferric vanchrobactin transport
Enterochelin ABC	VAA_RS17530	x	x	x	x	x	x	x	x	x	x	x	x	x	x	x	x	x	x	x	x	x	x	x	x	x	x	x	x	x	x	x	x	x	x	x	x	x	x	x	x	x	x	x	x
Iron ABC	VAA_RS17535	x	x	x	x	x	x	x	x	x	x	x	x	x	x	x	x	x	x	x	x	x	x	x	x	x	x	x	x	x	x	x	x	x	x	x	x	x	x	x	x	x	x	x	x
ABC transporter	VAA_RS17540	x	x	x	x	x	x	x	x	x	x	x	x	x	x	x	x	x	x	x	x	x	x	x	x	x	x	x	x	x	x	x	x	x	x	x	x	x	x	x	x	x	x	x	x
Iron ABC transporter	VAA_RS17545	x	x	x	x	x	x	x	x	x	x	x	x	x	x	x	x	x	x	x	x	x	x	x	x	x	x	x	x	x	x	x	x	x	x	x	x	x	x	x	x	x	x	x	x
Hemolysins
vah1	VAA_RS17490	x	x	x	x	x	x	x	x	x	x	x	x	x	x	x	x	x	x	x	x	x	x	x	x	x	x	x	x	x	x	x	x	x	x	x	x	x	x	x	x	x	x	x	x
RTX toxins
RTX toxin and related Ca2+-binding protein genes	VAA_RS08550	x	x	x	x	x	x	x	x	x	x	x	x	x	x	x	x	x	x	x	x	x	x	x	x	x	x	x	x	x	x	x	x	x	x	x	x	x	x	x	x	x	x	x	x
Metalloproteases
Virulence metalloprotease empA	VAA_RS15875	0	0	0	0	0	0	0	0	0	0	0	0	0	0	0	0	0	0	0	0	0	0	0	0	x	0	0	0	0	0	0	0	0	0	0	0	0	0	0	0	0	0	0	0
Zinc protease, insulinase family gene	VAA_RS14350	x	x	x	x	x	x	x	x	x	x	x	x	x	x	x	x	x	x	x	x	x	x	x	x	x	x	x	x	x	x	x	x	x	x	x	x	x	x	x	x	x	x	x	x
Secreted enzymes
Phospholipase C gene	VAA_RS15975	x	x	x	x	x	x	x	x	x	x	x	x	x	x	x	x	x	x	x	x	x	x	x	x	x	x	x	x	x	x	x	x	x	x	x	x	x	x	x	x	x	x	x	x
Nonhemolytic enterotoxin lytic component L1 genec (toxin2)	VAA_RS16430	x	x	x	x	x	x	x	x	x	x	x	x	x	x	x	x	x	x	x	x	x	x	x	x	x	x	x	x	x	x	x	x	x	x	x	x	x	x	x	x	x	x	x	x
Nonhemolytic enterotoxin lytic component L1 genec (toxin1)	VAA_RS16425	x	x	x	x	x	x	x	x	x	x	x	x	x	x	x	x	x	x	x	x	x	x	x	x	x	x	x	x	x	x	x	x	x	x	x	x	x	x	x	x	x	x	x	x
Microbial collagenase gene, secreted	VAA_RS17520	x	x	x	x	x	x	x	x	x	x	x	x	x	x	x	x	x	x	x	x	x	x	x	x	x	x	x	x	x	x	x	x	x	x	x	x	x	x	x	x	x	x	x	x
Lipase family protein gene	VAA_RS17795	x	x	x	0	x	0	0	x	0	0	0	x	x	x	x	x	x	x	0	x	0	x	0	0	0	x	0	0	0	0	x	0	0	0	x	0	0	0	x	x	0	0	x	x
Chemotaxis
Methyl-accepting chemotaxis gene (Macp3)	VAA_RS15005	x	x	x	x	x	x	x	x	x	x	x	x	x	x	x	x	x	x	x	x	x	x	x	x	x	x	x	x	x	x	x	x	x	x	x	x	x	x	x	x	x	x	x	x
Methyl-accepting chemotaxis gene (Macp2)	VAA_RS17310	x	x	x	x	x	x	x	x	x	x	x	x	x	x	x	x	x	x	x	x	x	x	x	x	x	x	x	x	x	x	x	x	x	x	x	x	x	x	x	x	x	x	x	x
Methyl-accepting chemotaxis gene (Macp1)	VAA_RS16905	x	x	x	x	x	x	x	x	x	x	x	x	x	x	x	x	x	x	x	x	x	x	x	x	x	x	x	x	x	x	x	x	x	x	x	x	x	x	x	x	x	x	x	x
Methyl-accepting chemotaxis gene (CheR)	VAA_RS16325	x	x	x	x	x	x	x	x	x	x	x	x	x	x	x	x	x	x	x	x	x	x	0	x	x	x	x	x	x	x	x	x	x	x	x	x	x	x	x	x	x	x	x	x
Methyl-accepting chemotaxis gene (Macp4)	VAA_RS17610	x	x	x	x	x	x	x	x	x	x	x	x	x	x	x	x	x	x	x	x	x	x	x	x	x	x	x	x	x	x	x	x	x	x	x	x	x	x	x	x	x	x	0	x
Methyl-accepting chemotaxis gene (Macp5)	VAA_RS17430	x	x	x	x	x	x	x	x	x	x	x	x	x	x	x	x	x	x	x	x	x	x	x	x	x	x	x	x	x	x	x	x	x	x	x	x	x	x	x	x	x	x	x	x
Methyl-accepting chemotaxis gene (Macp6)	VAA_RS16920	x	x	x	x	x	x	x	x	x	x	x	x	x	x	x	x	x	x	x	x	x	x	x	x	x	x	x	x	x	x	x	x	x	x	x	x	x	x	x	x	x	x	x	x
Methyl-accepting chemotaxis gene (Macp7)	VAA_RS16330	x	x	x	x	x	x	x	x	x	x	x	x	x	x	x	x	x	x	x	x	x	x	x	x	x	x	x	x	x	x	x	x	x	x	x	x	x	x	x	x	x	x	x	x
Methyl-accepting chemotaxis gene (Macp8)	VAA_RS16065	x	x	x	x	x	x	x	x	x	x	x	x	x	x	x	x	x	x	x	x	x	x	x	x	x	x	x	x	x	x	x	x	x	x	x	x	x	x	x	x	x	x	x	x
Methyl-accepting chemotaxis gene (Macp9)	VAA_RS15255	x	x	x	x	x	x	x	x	x	x	x	x	x	x	x	x	x	x	x	x	x	x	x	x	x	x	x	x	x	x	x	x	x	x	x	x	x	x	x	x	x	x	x	x
Methyl-accepting chemotaxis gene (Macp10)	VAA_RS14290	x	x	x	x	x	x	x	x	x	x	x	x	x	x	x	x	x	x	x	x	x	x	x	x	x	x	x	x	x	x	x	x	x	x	x	x	x	x	x	x	x	x	x	x
Methyl-accepting chemotaxis gene (Macp11)	VAA_RS16310	x	x	x	x	x	x	x	x	x	x	x	x	x	x	x	x	x	x	x	x	x	x	x	x	x	x	x	x	x	x	x	x	x	x	x	x	x	x	x	x	x	x	x	x
Methyl-accepting chemotaxis gene (Macp12)	VAA_RS16225	x	x	x	x	x	x	x	x	x	x	x	x	x	x	x	x	x	x	x	x	x	x	x	x	x	x	x	x	x	x	x	x	x	x	x	x	x	x	x	x	x	x	x	x
Methyl-accepting chemotaxis gene (Macp13)	VAA_RS16195	x	x	x	x	x	x	x	x	x	x	x	x	x	x	x	x	x	x	x	x	x	x	x	x	x	x	x	x	x	x	x	x	x	x	x	x	x	x	x	x	x	x	x	x
Methyl-accepting chemotaxis gene (Macp14)	VAA_RS16185	x	x	x	x	x	x	x	x	x	x	x	x	x	x	x	x	x	x	x	x	x	x	x	x	x	x	x	x	x	x	x	x	x	x	x	x	x	x	x	x	x	x	x	x
Methyl-accepting chemotaxis gene (Macp15)	VAA_RS14515	x	x	x	x	x	x	x	x	x	x	x	x	x	x	x	x	x	x	x	x	x	x	x	x	x	x	x	x	x	x	x	x	x	x	x	x	x	x	x	x	x	x	x	x
Methyl-accepting chemotaxis gene (Macp16)	VAA_RS15235	x	x	x	x	x	x	x	x	x	x	x	x	x	x	x	x	x	x	x	x	x	x	x	x	x	x	x	x	x	x	x	x	x	x	x	x	x	x	x	x	x	x	x	x
Methyl-accepting chemotaxis gene (Macp17)	VAA_RS16315	x	x	x	x	x	x	x	x	x	x	x	x	x	x	x	x	x	x	x	x	x	x	x	x	x	x	x	x	x	x	x	x	x	x	x	x	x	x	x	x	x	x	x	x
Methyl-accepting chemotaxis gene (CheD)	VAA_RS16320	x	x	x	x	x	x	x	x	x	x	x	x	x	x	x	x	x	x	x	x	x	x	x	x	x	x	x	x	x	x	x	x	x	x	x	x	x	x	x	x	x	x	x	x
Methyl-accepting chemotaxis gene (Macp18)	VAA_RS16000	x	x	x	x	x	x	x	x	x	x	x	x	x	x	x	x	x	x	x	x	x	x	x	x	x	x	x	x	x	x	x	x	x	x	x	x	x	x	x	x	x	x	x	x
Type VI secretion system (vtsA-vtsH system II)
vstA	VAA_RS16745	x	x	x	x	x	x	x	x	x	x	x	x	x	x	x	x	x	x	x	x	x	x	x	x	x	x	x	x	x	x	x	x	x	x	x	x	x	x	x	x	x	x	x	x
vstB	VAA_RS16750	x	x	x	x	x	x	x	x	x	x	x	x	x	x	x	x	x	x	x	x	x	x	x	x	x	x	x	x	x	x	x	x	x	x	x	x	x	x	x	x	x	x	x	x
vstlysozyme	VAA_RS16755	x	x	x	x	x	x	x	x	x	x	x	x	x	x	x	x	x	x	x	x	x	x	x	x	x	x	x	x	x	x	x	x	x	x	x	x	x	x	x	x	x	x	x	x
vstC	VAA_RS16760	x	x	x	x	x	x	x	x	x	x	x	x	x	x	x	x	x	x	x	x	x	x	x	x	0	x	x	x	x	x	x	x	x	x	x	x	x	x	x	x	x	x	x	x
vstD	VAA_RS16770	x	x	x	x	x	x	x	x	x	x	x	x	x	x	x	x	x	x	x	x	x	x	x	x	0	x	x	x	x	x	x	x	x	x	x	x	x	x	x	x	x	x	x	x
vstE	VAA_RS16775	x	x	x	x	x	x	x	x	x	x	x	x	x	x	x	x	x	x	x	x	x	x	x	x	x	x	x	x	x	x	x	x	x	x	x	x	x	x	x	x	x	x	x	x
vstF	VAA_RS16780	x	x	x	x	x	x	x	x	x	x	x	x	x	x	x	x	x	x	x	x	x	x	x	x	x	x	x	x	x	x	x	x	x	x	x	x	x	x	x	x	x	x	x	x
DotU	VAA_RS16785	x	x	x	x	x	x	x	x	x	x	x	x	x	x	x	x	x	x	x	x	x	x	x	x	x	x	x	x	x	x	x	x	x	x	x	x	x	x	x	x	x	x	x	x
ClpV1	VAA_RS16790	x	x	x	x	x	x	x	x	x	x	x	x	x	x	x	x	x	x	x	x	x	x	x	x	x	x	x	x	x	x	x	x	x	x	x	x	x	x	x	x	x	x	x	x
ATPase	VAA_RS16795	x	x	x	x	x	x	x	x	x	x	x	x	x	x	x	x	x	x	x	x	x	x	x	x	x	x	x	x	x	x	x	x	x	x	x	x	x	x	x	x	x	x	x	x
vstG	VAA_RS16800	x	x	x	x	x	x	x	x	x	x	x	x	x	x	x	x	x	x	x	x	x	x	x	x	x	x	x	x	x	x	x	x	x	x	x	x	x	x	x	x	x	x	x	x
vstH	VAA_RS16805	x	x	x	x	x	x	x	x	x	x	x	x	x	x	x	x	x	x	x	x	x	x	x	x	x	x	x	x	x	x	x	x	x	x	x	x	x	x	x	x	x	x	x	x
vstI	VAA_RS16810	x	x	x	x	x	x	x	x	x	x	x	x	x	x	x	x	x	x	x	x	x	x	x	x	x	x	x	x	x	x	x	x	x	x	x	x	x	x	x	x	x	x	x	x
vstJ	VAA_RS16815	x	x	x	x	x	x	x	x	x	x	x	x	x	x	x	x	x	x	x	x	x	x	x	x	x	x	x	x	x	x	x	x	x	x	x	x	x	x	x	x	x	x	x	x
vstk	VAA_RS16820	x	x	x	x	x	x	x	x	x	x	x	x	x	x	x	x	x	x	x	x	x	x	x	x	x	x	x	x	x	x	x	x	x	x	x	x	x	x	x	x	x	x	x	x
Quorum sensing
vanMN1	VAA_RS15435	x	x	x	x	x	x	x	x	x	x	x	x	x	x	x	x	x	x	x	x	x	x	x	x	x	x	x	x	x	x	x	x	x	x	x	x	x	x	x	x	x	x	x	x
vanMN2	VAA_RS15440	x	x	x	x	x	x	x	x	x	x	x	x	x	x	x	x	x	x	x	x	x	x	x	x	x	x	x	x	x	x	x	x	x	x	x	x	x	x	x	x	x	x	x	x
vanR	VAA_RS15590	x	x	x	x	x	x	x	x	x	x	x	x	x	x	x	x	x	x	x	x	x	x	x	x	x	x	x	x	x	x	x	x	x	x	x	x	x	x	x	x	x	x	x	x
vanI	VAA_RS15595	x	x	x	x	x	x	x	x	x	x	x	x	x	x	x	x	x	x	x	x	x	x	x	x	x	x	x	x	x	x	x	x	x	x	x	x	x	x	x	x	x	x	x	x
vanQP	VAA_RS14810	x	x	x	x	x	x	x	x	x	x	x	x	x	x	x	x	x	x	x	x	x	x	x	x	x	x	x	x	x	x	x	x	x	x	x	x	x	x	x	x	x	x	x	x
vanT	VAA_RS15210	x	x	x	x	x	x	x	x	x	x	x	x	x	x	x	x	x	x	x	x	x	x	x	x	x	x	x	x	x	x	x	x	x	x	x	x	x	x	x	x	x	x	x	x
Regulators
VirK	VAA_RS16590	x	x	x	x	x	x	x	x	x	x	x	x	x	x	x	x	x	x	x	x	x	x	x	x	x	x	x	x	x	x	x	x	x	x	x	x	x	x	x	x	x	x	x	x
slyA	VAA_RS16595	x	x	x	x	x	x	x	x	x	x	x	x	x	x	x	x	x	x	x	x	x	x	x	x	x	x	x	x	x	x	x	x	x	x	x	x	x	x	x	x	x	x	x	x
Transcriptional activator HlyU gene	VAA_RS11710	x	x	x	x	x	x	x	x	x	x	x	x	x	x	x	x	x	x	x	x	x	x	x	x	x	x	x	x	x	x	x	x	x	x	x	x	x	x	x	x	x	x	x	x
Transcriptional regulator VpsT gene	VAA_RS15630	x	x	x	x	x	x	x	x	x	x	x	x	x	x	x	x	x	x	x	x	x	x	x	x	x	x	x	x	x	x	x	x	x	x	x	x	x	x	x	x	x	x	x	x

## Sheet: plasmid
Putative virulence factors plasmid	Gene tag
		990909-1/2A	920619-1/1	891221-1/1	171124-1/1A	178581-2	840523-2/3	171026-1/1	171013-1/4	171013-1/2	171004-1/1	131108-2/1	150312-1/1	130829-1/3A	100719-1/4A	090602-1/12	060712-1/1	030905-1/1A	17-16730-2A
Anguibactin biosynthesis and iron transport
angGHMNRTU	AY312585.1
angG		x	x	x	x	x	x	x	x	x	x	x	x	x	x	x	x	x	x
angH		x	x	x	x	x	x	x	x	x	x	x	x	x	x	x	x	x	x
angM		x	x	x	x	x	x	x	x	x	x	x	x	x	x	x	x	x	x
angN		x	x	x	x	x	x	x	x	x	x	x	x	x	x	x	x	x	x
angR		x	x	x	x	x	x	x	x	x	x	x	x	x	x	x	x	x	x
angT		x	x	x	x	x	x	x	x	x	x	x	x	x	x	x	x	x	x
angU		x	x	x	x	x	x	x	x	x	x	x	x	x	x	x	x	x	x
fatA-fatD	AY312585.1
fatA		x	x	x	x	x	x	x	x	x	x	x	x	x	x	x	x	x	x
fatB		x	x	x	x	x	x	x	x	x	x	x	x	x	x	x	x	x	x
fatC		x	x	x	x	x	x	x	x	x	x	x	x	x	x	x	x	x	x
fatD		x	x	x	x	x	x	x	x	x	x	x	x	x	x	x	x	x	x

## Sheet: pan-genome
Gene	Non-unique Gene name	Annotation	No. isolates	No. sequences	Avg sequences per isolate	Genome Fragment	Order within Fragment	Accessory Fragment	Accessory Order with Fragment	QC	Min group size nuc	Max group size nuc	Avg group size nuc	030305_1_5	030905_1_1A	040714_1_1D	040714_1_4C	040809_1_2A	040915_1_1B	060712_1_1	060721_1_1B	090519_1_13A	090602_1_12	090602_1_6B	090707_1_1A	090707_1_2A	090710_1_17A	090819_1_28A	090819_1_29A	090903_1_2B	100719_1_3A	100719_1_4A	100721_1_3A	100819_1_4A	130829_1_3A	131108_2_1	150312_1_1	150811_01	171004_1_1	171013_1_2	171013_1_4	171026_1_1	171124_1_1A	178581_2	17_16730_2A	4070_E	840523_2_3	840613_2_1	850617_1_1
empA_2		Virulence metalloprotease precursor	44	44	1	403	4678				1469	1835	1826	030305_1_5_02466	PROKKA_02492	PROKKA_00579___579	PROKKA_01589___5527	PROKKA_00322___8525	PROKKA_02356___15351	PROKKA_00187___18098	PROKKA_02433___24832	PROKKA_00964___27761	PROKKA_02242___33611	PROKKA_00337___36013	PROKKA_00857___40295	PROKKA_00249___43538	PROKKA_01848___49509	PROKKA_02032___54110	PROKKA_03034___59820	PROKKA_00989___61955	PROKKA_01330___67041	PROKKA_03165___73268	PROKKA_03306___77791	PROKKA_01973___80508	PROKKA_01560___84671	PROKKA_02989___90524	PROKKA_02962___94805	PROKKA_01987___98141	PROKKA_03226___104171	PROKKA_01569___106963	PROKKA_01044___110693	PROKKA_01871___115853	PROKKA_01799___120200	PROKKA_01351___128560	PROKKA_01288___124088	PROKKA_00291___131806	PROKKA_01909___137759	PROKKA_03876___144245	PROKKA_01902___146601
virB		Virulence regulon transcriptional activator VirB	44	44	1	403	1696				971	971	971	030305_1_5_01220	PROKKA_03286	PROKKA_01093___1093	PROKKA_02560___6498	PROKKA_02214___10418	PROKKA_01756___14751	PROKKA_02511___20422	PROKKA_02181___24580	PROKKA_02693___29491	PROKKA_03812___35181	PROKKA_01787___37463	PROKKA_01679___41117	PROKKA_03211___46500	PROKKA_02284___49945	PROKKA_00809___52887	PROKKA_02246___59032	PROKKA_02932___63898	PROKKA_01170___66881	PROKKA_02850___72953	PROKKA_01765___76250	PROKKA_02780___81315	PROKKA_03518___86629	PROKKA_01823___89358	PROKKA_03762___95605	PROKKA_00724___96878	PROKKA_03817___104762	PROKKA_03821___109215	PROKKA_03133___112782	PROKKA_03223___117205	PROKKA_02993___121394	PROKKA_02410___129619	PROKKA_03709___126509	PROKKA_00398___131913	PROKKA_01777___137627	PROKKA_03326___143695	PROKKA_03061___147760
phoQ		Virulence sensor histidine kinase PhoQ	44	44	1	403	389				1340	1340	1340	030305_1_5_01059	PROKKA_03221	PROKKA_03056___3056	PROKKA_03311___7249	PROKKA_02524___10728	PROKKA_01329___14324	PROKKA_00287___18198	PROKKA_00345___22744	PROKKA_03252___30050	PROKKA_02058___33427	PROKKA_02190___37866	PROKKA_03163___42601	PROKKA_00733___44022	PROKKA_03100___50761	PROKKA_01003___53081	PROKKA_00085___56871	PROKKA_03131___64097	PROKKA_00630___66341	PROKKA_03562___73665	PROKKA_02268___76753	PROKKA_03792___82327	PROKKA_02536___85647	PROKKA_02937___90472	PROKKA_03523___95366	PROKKA_03159___99314	PROKKA_01690___102635	PROKKA_01650___107044	PROKKA_03417___113066	PROKKA_02578___116560	PROKKA_03436___121837	PROKKA_02621___129830	PROKKA_03452___126252	PROKKA_00816___132331	PROKKA_03368___139218	PROKKA_02615___142984	PROKKA_01214___145913
apxIB_1		Toxin RTX-I translocation ATP-binding protein	44	44	1	403	7178				2135	2135	2135	030305_1_5_01828	PROKKA_00912	PROKKA_02759___2759	PROKKA_02849___6787	PROKKA_00546___8749	PROKKA_00327___13322	PROKKA_02877___20788	PROKKA_02252___24651	PROKKA_02090___28888	PROKKA_01490___32859	PROKKA_00057___35733	PROKKA_02878___42316	PROKKA_02667___45956	PROKKA_02741___50402	PROKKA_00182___52260	PROKKA_01510___58296	PROKKA_02162___63128	PROKKA_01833___67544	PROKKA_02232___72335	PROKKA_01426___75911	PROKKA_01548___80083	PROKKA_01748___84859	PROKKA_02114___89649	PROKKA_01075___92918	PROKKA_01459___97613	PROKKA_02562___103507	PROKKA_01440___106834	PROKKA_02091___111740	PROKKA_01028___115010	PROKKA_00705___119106	PROKKA_01942___129151	PROKKA_02641___125441	PROKKA_00457___131972	PROKKA_00861___136711	PROKKA_00068___140437	PROKKA_00248___144947
apxIB_2		Toxin RTX-I translocation ATP-binding protein	44	44	1	403	7176				2108	2108	2108	030305_1_5_01826	PROKKA_00910	PROKKA_02761___2761	PROKKA_02847___6785	PROKKA_00548___8751	PROKKA_00325___13320	PROKKA_02879___20790	PROKKA_02250___24649	PROKKA_02092___28890	PROKKA_01488___32857	PROKKA_00059___35735	PROKKA_02876___42314	PROKKA_02669___45958	PROKKA_02743___50404	PROKKA_00184___52262	PROKKA_01512___58298	PROKKA_02164___63130	PROKKA_01831___67542	PROKKA_02230___72333	PROKKA_01428___75913	PROKKA_01546___80081	PROKKA_01750___84861	PROKKA_02116___89651	PROKKA_01073___92916	PROKKA_01461___97615	PROKKA_02564___103509	PROKKA_01442___106836	PROKKA_02093___111742	PROKKA_01030___115012	PROKKA_00707___119108	PROKKA_01940___129149	PROKKA_02643___125443	PROKKA_00459___131974	PROKKA_00863___136713	PROKKA_00066___140435	PROKKA_00246___144945
apxIB_4		Toxin RTX-I translocation ATP-binding protein	31	31	1	403	6730	1	2998	Hypothetical protein with no hits to refseq/uniprot/clusters/cdd/tigrfams/pfam overlapping another protein with hits	170	2150	1429		PROKKA_03986	PROKKA_02558___2558	PROKKA_03497___7435		PROKKA_01147___14142	PROKKA_04026___21937	PROKKA_02753___25152		PROKKA_03946___35315	PROKKA_03036___38712	PROKKA_00420___39858	PROKKA_02228___45517		PROKKA_02408___54486	PROKKA_02278___59064			PROKKA_04060___74163	PROKKA_03328___77813		PROKKA_04036___87147	PROKKA_04200___91735	PROKKA_04138___95981				PROKKA_04043___113692	PROKKA_04239___118221	PROKKA_04285___122687	PROKKA_04077___131286	PROKKA_04274___127074	PROKKA_03688___135204		PROKKA_00095___140464	PROKKA_03771___148470
group_702	toxA	Toxin A	30	30	1	403	4478	1	338	Hypothetical protein with no hits to refseq/uniprot/clusters/cdd/tigrfams/pfam overlapping another protein with hits	338	1544	1274		PROKKA_02169		PROKKA_04059___7997	PROKKA_04499___12704	PROKKA_04585___17580	PROKKA_00738___18649		PROKKA_04329___31127	PROKKA_03161___34530		PROKKA_03766___43204	PROKKA_03785___47074		PROKKA_04280___56358				PROKKA_02846___72949			PROKKA_02809___85920	PROKKA_01297___88832	PROKKA_01287___93130	PROKKA_04722___100878	PROKKA_00078___101023	PROKKA_03366___108760	PROKKA_03210___112859	PROKKA_02005___115987	PROKKA_01848___120249	PROKKA_03269___130478	PROKKA_03614___126414	PROKKA_04188___135704	PROKKA_00004___135854
apxIB_5		Toxin RTX-I translocation ATP-binding protein	26	26	1	403	6724	1	2997	Hypothetical protein with no hits to refseq/uniprot/clusters/cdd/tigrfams/pfam overlapping another protein with hits	203	1646	1177	030305_1_5_03701				PROKKA_03016___11220			PROKKA_02754___25153	PROKKA_03178___29976		PROKKA_03037___38713	PROKKA_00421___39859	PROKKA_02227___45516	PROKKA_02508___50169			PROKKA_03231___64197	PROKKA_03026___68738			PROKKA_02655___81190	PROKKA_04068___87179	PROKKA_04024___91559		PROKKA_03359___99514	PROKKA_04219___105164			PROKKA_03954___117936		PROKKA_04238___131447	PROKKA_04378___127178		PROKKA_04336___140186	PROKKA_00096___140465
zot		Zona occludens toxin	25	25	1	403	4243	1	3703	Hypothetical protein with no hits to refseq/uniprot/clusters/cdd/tigrfams/pfam overlapping another protein with hits	287	1472	1069	030305_1_5_00009	PROKKA_04001			PROKKA_03626___11831				PROKKA_02978___29776		PROKKA_03468___39144	PROKKA_03385___42823	PROKKA_03472___46761	PROKKA_03469___51130	PROKKA_03766___55844	PROKKA_03306___60092	PROKKA_03453___64419		PROKKA_03956___74059	PROKKA_03553___78038	PROKKA_03678___82213	PROKKA_03914___87025	PROKKA_03907___91442		PROKKA_03841___99997					PROKKA_03935___122336	PROKKA_03969___131178	PROKKA_03930___126730			PROKKA_03456___143825
apxIA		RTX-I toxin determinant A from serotypes 1/9	25	25	1	403	3773	37	2		359	4532	3656	030305_1_5_01122		PROKKA_03623___3623	PROKKA_03519___7457	PROKKA_02619___10823	PROKKA_00078___13073		PROKKA_01489___23888	PROKKA_01651___28449		PROKKA_03365___39041	PROKKA_00074___39512	PROKKA_01818___45107	PROKKA_00846___48506	PROKKA_03404___55482	PROKKA_02420___59206	PROKKA_00574___61540	PROKKA_01103___66814		PROKKA_01922___76407	PROKKA_03606___82141				PROKKA_00333___96487						PROKKA_03983___131192				PROKKA_02953___143322
group_1081	apxIA	RTX-I toxin determinant A from serotypes 1/9	21	21	1	403	315	37	5		881	5816	4300		PROKKA_01493					PROKKA_03668___21579			PROKKA_03653___35022					PROKKA_03404___55482				PROKKA_01296___71399			PROKKA_03386___86497	PROKKA_02765___90300	PROKKA_03712___95555		PROKKA_03146___104091	PROKKA_03387___108781	PROKKA_03294___112943	PROKKA_03608___117590	PROKKA_01121___119522	PROKKA_03212___130421	PROKKA_03707___126507	PROKKA_00752___132267	PROKKA_03482___139332		PROKKA_00001___144700
group_1774	apxIB_5	Toxin RTX-I translocation ATP-binding protein	11	11	1	403	6729	1	2929		254	1646	1226			PROKKA_02557___2557	PROKKA_03498___7436		PROKKA_01148___14143	PROKKA_04277___22188		PROKKA_04119___30917						PROKKA_02409___54487	PROKKA_02279___59065				PROKKA_03329___77814												PROKKA_04223___127023				PROKKA_03957___148656
zot_1		Zona occludens toxin	8	8	1	403	4224	1	3683		302	1148	861									PROKKA_02998___29796	PROKKA_04229___35598				PROKKA_03449___51110	PROKKA_04249___56327		PROKKA_00521___61487				PROKKA_01374___79909				PROKKA_00386___96540		PROKKA_04241___109635
group_4154	apxIB_4	Toxin RTX-I translocation ATP-binding protein	8	8	1	403	6725	1	2995		503	2204	1991					PROKKA_03015___11219				PROKKA_03177___29975					PROKKA_02509___50170	PROKKA_04688___56766		PROKKA_03230___64196	PROKKA_03025___68737			PROKKA_02656___81191				PROKKA_03360___99515
group_71	zot_2	Zona occludens toxin	5	5	1	403	4151	1	136		623	1247	959																																			PROKKA_03691___144060
toxA_1		Toxin A	1	1	1	403	7103	791	1		14207	14207	14207				PROKKA_03449___7387
group_72	zot	Zona occludens toxin	1	1	1	403	4149	1	125		1247	1247	1247
[truncated: 8 more columns]
